# Supplementary material
Source: ML conference proceedings conference paper supplement (https://openreview.net/forum?id=rNgVmU52KY)
Supplement: supplementary_material [file attachment]

# ON THE THEORY OF CONTINUAL LEARNING WITH GRADIENT DESCENT FOR NEURAL NETWORKS

**Anonymous authors**

Paper under double-blind review

## ABSTRACT

Continual learning, the ability of a model to adapt to an ongoing sequence of tasks without forgetting the earlier ones, is a central goal of artificial intelligence. To shed light on its underlying mechanisms, we analyze the limitations of continual learning in a tractable yet representative setting. In particular, we study one-hidden-layer quadratic neural networks trained by gradient descent on an XOR cluster dataset with Gaussian noise, where different tasks correspond to different clusters with orthogonal means. Our results obtain bounds on the rate of forgetting during train and test-time in terms of the number of iterations, the sample size, the number of tasks, and the hidden-layer size. Our results reveal interesting phenomena on the role of different problem parameters in the rate of forgetting. Numerical experiments across diverse setups confirm our results, demonstrating their validity beyond the analyzed settings.

## 1 INTRODUCTION

### 1.1 MOTIVATION

Gradient-based methods are the primary approach for training neural networks. In recent years, research in learning theory has shown that neural networks can efficiently learn various data classes using empirical risk minimization (ERM) methods. In many real-world settings, data arrive sequentially in a non-stationary manner, requiring the learner to maintain performance on past tasks while acquiring new capabilities. In such cases, a learning model must be continually learnable, meaning it should retain previously acquired knowledge when trained on new tasks. On the other hand, various learning systems, including deep learning architectures, can be prone to *catastrophic forgetting*, that is, updating a model on new data causes a dramatic drop in performance on previously learned tasks (McCloskey & Cohen, 1989; Goodfellow et al., 2013). The goal of continual (lifelong) learning is to develop models and methods that, even without retraining on old data, experience minimal forgetting when incorporating new information.

Despite deep learning’s ubiquity, characterizing the power and limitations of neural networks is still an ongoing research direction. While several recent works aim to understand the power of gradient descent (GD) for training neural networks with stylized data distributions, these works are still limited to single-task scenarios (for some examples see (Du et al., 2019; Bartlett et al., 2021; Abbe et al., 2022)). However, the strengths and limitations of gradient descent in continual learning remain largely unexplored.

In this work, we present several results on the performance of gradient descent in neural networks for scenarios where there is a stream of independent tasks on which the model is sequentially trained. We mainly focus on studying unregularized ERM for this problem and identify regimes and conditions for clustered synthetic datasets where gradient descent without any explicit regularization is capable of achieving arbitrarily small forgetting and small test error for all tasks simultaneously. In doing so, we consider a simple but illustrative nonlinear data distribution for multiple independent tasks based on XOR clusters, and characterize the sample, iteration, and computation complexities based on data dimension and number of tasks for successful continual learning. We are also able to characterize the forgetting error in terms of problem variables for a given task after training the network on arbitrary number of subsequent tasks. We show that both train- and test-time forgetting errors can be mitigated by increasing the sample size of the subsequent tasks.

**Techniques and Contributions.** Our method is based on the decomposition of the test-time forgetting error into two terms based on forgetting in training loss and the generalization gap caused by intermediate learning tasks. We bound the generalization gap by an argument based on algorithmic stability (Bousquet & Elisseeff, 2002; Lei & Ying, 2020a) tailored to our set-up of continual learning with neural nets, which leads to conditions on the network width and the number of iterations and samples to achieve a small generalization error after learning independent intermediate tasks from distinct distributions. We then use a data-specific argument to formulate the evolution of the learned weights throughout the gradient descent steps to bound the training loss and forgetting. In particular, we first consider an asymptotic regime where for both the sample size and network size  $m, n \rightarrow \infty$ . The critical observation here is that in this regime, for every task, the gradient at initialization is in the correct direction, and with sufficient number of GD steps, the train loss and the amount of forgetting (i.e., the increase in training loss caused by learning later tasks) are asymptotically zero. As a result of this and with concentration bounds for finite  $n$  and  $m$ , we are able to characterize the rate of forgetting based on these parameters. To the best of our knowledge, our results are the first closed-form guarantees for the train and test performance of continual learning methods when using neural networks and they predict several of the empirical observations on the role of training-set size and over-parameterization. We summarize our contributions in the following:

- We prove bounds for forgetting in continual learning using neural nets, showing for the  $d$ -dimensional XOR cluster dataset that train-time forgetting after training for  $K$  subsequent tasks is bounded by  $\tilde{O}(\eta T \frac{\sqrt{K}}{d\sqrt{n}} + \eta T \frac{\sqrt{K}}{d^2 \text{poly} \log(d)} + \eta^2 T^2 \frac{K^2}{\sqrt{m}})$  where  $T$  and  $n$  denote the number of GD iterations and sample size for each subsequent task, respectively, and  $m$  denotes the hidden layer size.
- We characterize the sample and computation complexity for continual learning, derive a rate of  $n = \tilde{\Theta}(d^2 K), m = \Theta(d^8 K^4), T = \tilde{\Theta}(d^2)$  for the number of samples, hidden-layer size, and number of GD iterations, respectively, to achieve small training loss for all  $K$  tasks.
- We derive a bound on the test-time forgetting by decomposing it into the train-time forgetting term and a delayed generalization term, and we show the above complexities also lead to vanishing test-time forgetting.
- Numerical experiments support our theoretical insights across diverse problem settings, demonstrating their applicability to models and data distributions beyond those explicitly analyzed.

## 1.2 PRIOR WORKS

The main algorithms for continual learning are based on functional (or architectural) regularization (Li & Hoiem, 2017; Kirkpatrick et al., 2017; Sharif Razavian et al., 2014) or experience replaying (Schaal et al., 2016; Rolnick et al., 2019). In order to mitigate forgetting, regularization-based methods enforce the new solutions to remain close to solutions to previous tasks. On the other hand, it has been hypothesized that the network width has a similar impact (Graldi et al., 2024), since increasing the width enables the network to operate in the lazy/kernel regime where it is known that the network’s weights do not travel a significant distance from their initialization point and the features remain constant during training (Jacot et al., 2018; Ghorbani et al., 2019). It is therefore natural to ask to what extent the width helps continual learning. Few works have dealt with this question. In particular, the impact of the width of the network on continual learning was studied in (Guha & Lakshman, 2024; Graldi et al., 2024; Mirzadeh et al., 2022a;b; Wenger et al., 2023). For instance, (Mirzadeh et al., 2022a;b) observed the impact of width in improving catastrophic forgetting and noticed that increasing the width always mitigates forgetting. However, (Wenger et al., 2023) claimed that such improvements vanish when the network is trained for a sufficiently large number of iterations until convergence. More recently, (Graldi et al., 2024) attempted to resolve the issue claiming that improvements only happen in the kernel regime, where there is early stopping to avoid weights moving a significant distance from their initialization. Our theoretical and empirical results on the impact width for the XOR cluster data also verify the benefits of width in the kernel regime with early stopping.

(Guha & Lakshman, 2024) showed analytically through a general argument that increasing the width helps continual learning, although the improvements shrink as width grows. The dependence on width in their bound is not explicitly determined, and moreover, the bound does not depend on the underlying algorithm or number of samples. In contrast, our analysis is algorithm-dependent

and yields closed-form bounds, explicitly highlighting the roles of different problem parameters in test-time forgetting.

Perhaps the closest works to ours are (Doan et al., 2021; Bennani et al., 2020; Lee et al., 2021; Karakida & Akaho, 2021), which derived general expressions to characterize forgetting in neural networks in the lazy regime. A recent work by (Li et al., 2025) focuses specifically on CNNs in a multi-view data model and characterizes forgetting. (Benjamin et al., 2024) approach uses an “ensemble/NTK” perspective treating networks in the lazy regime and gives a reinterpretation of continual learning. (Ardle & Yasaei Sekeh, 2022) focus on layer-wise information flow and develop a probabilistic theory for CL performance across layers. However, these results do not lead to closed-form bounds and are applicable for different models such as CNNs, while our results yield the first bounds for a multi-index model learned by neural nets.

Another related line of work has focused on linear classification/regression in the realizable regime, where a single linear solution can interpolate data from all tasks (Goldfarb & Hand, 2023; Lin et al., 2023; Evron et al., 2023; Banayeezade et al., 2024). In particular, (Evron et al., 2023) analyzed catastrophic forgetting through the lens of implicit bias in linear classification across various setups, including cyclic and random task orderings. (Cao et al., 2022) derived sample complexity of continually learning linear models and GLMs. In contrast, we adopt a more practical perspective by examining sample complexity, early stopping, and the effects of over-parameterization in a stylized neural network setting.

Our analysis of the generalization error is done through the lens of the algorithmic-stability framework and follows the approach in (Hardt et al., 2016; Feldman & Vondrak, 2019; Lei & Ying, 2020a;b; Richards & Kuzborskij, 2021; Taheri & Thrampoulidis, 2024), extending it to accommodate the continual learning setting. Our results reveal that generalization gap for continual learning is impacted by the training loss of later tasks (as in Thm 4) or number of tasks (as in Thm 3) which is new compared to single-task analyses. For the training-loss analysis (Thm 1-2), we use a new approach based on a double-asymptotic regime where first we consider the regime of  $m \rightarrow \infty$  in order to characterize the weights for any number of iterations and then consider the asymptotes of  $n \rightarrow \infty$  in order to characterize the role of number of samples on the train-time forgetting. The final bound is obtained by deriving concentration error of finite-width networks for every GD iteration. This differs from the existing analyses of neural nets for single-task classification setups in the lazy regime which are mainly based on class margin (Nitanda et al., 2019; Ji & Telgarsky, 2020; Taheri & Thrampoulidis, 2024).

**Notation.** We use the standard complexity notation  $\lesssim, o(\cdot), O(\cdot), \Theta(\cdot), \Omega(\cdot)$  and denote  $\tilde{o}(\cdot), \tilde{O}(\cdot), \tilde{\Theta}(\cdot), \tilde{\Omega}(\cdot)$  to hide poly-logarithmic factors. The subscripts in  $O_d(\cdot), o_d(\cdot)$  denote the dependence on the parameter  $d$ . We use  $\|\cdot\|$  for the  $\ell_2$  norm of vectors. We denote  $[n] := \{1, 2, \dots, n\}$ . The expectation and probability with respect to the randomness in  $\mathcal{D}$  are denoted by  $\mathbb{E}_{\mathcal{D}}[\cdot], \Pr_{\mathcal{D}}(\cdot)$ . The gradient of the model  $\Phi : \mathbb{R}^{p \times d} \rightarrow \mathbb{R}$  with respect to the first input (weights) is denoted by  $\nabla \Phi$ .

## 2 MAIN RESULTS

### 2.1 PROBLEM SETUP

#### 2.1.1 GRADIENT-BASED CONTINUAL LEARNING WITH NEURAL NETWORKS

We consider the problem of sequentially learning  $K$  independent tasks, where each task is trained in isolation but in a fixed order. Specifically, for the  $k$ -th task, we perform  $T$  iterations of gradient descent using a dataset of  $n$  training samples. The objective of task  $k$  is defined as

$$\hat{F}(w, \mathcal{D}_k) = \frac{1}{n} \sum_{i=1}^n f(y_i \Phi(w, x_i)),$$

where  $\mathcal{D}_k = \{(x_i, y_i)\}_{i=1}^n$  denotes the set of training examples for task  $k$ , and the mapping  $\Phi$  represents a two-layer neural network with  $m$  hidden neurons and activation  $\phi$ , given by

$$\Phi(w, x) = \frac{1}{\sqrt{m}} \sum_{i=1}^m a_i \phi(x^\top w_i).$$

**Algorithm 1:** Continual Learning with Gradient Descent**Input:** Number of tasks  $K$ , number of steps per task  $T$ , learning rate  $\eta$ **Output:** Final model parameters  $w_K$ 


---

```

1 Initialize model parameters  $w_1^{(0)} \sim \mathcal{N}(0, I_p)$ ;
2 for  $k = 1$  to  $K$  do
3   Load task-specific dataset  $\mathcal{D}_k$ ;
4   for  $t = 0$  to  $T - 1$  do
5     Sample mini-batch(or full-batch)  $\mathcal{B}_t \subseteq \mathcal{D}_k$ ;
6      $w_k^{(t+1)} \leftarrow w_k^{(t)} - \eta \nabla \widehat{F}(w_k^{(t)}; \mathcal{B}_t)$ ;
7   Set  $w_{k+1}^{(0)} \leftarrow w_k := w_k^{(T)}$ ;
8 return  $w_K := w_K^{(T)}$ 

```

---

Throughout the paper, we assume that the output layer coefficients  $a_i \in \{\pm 1\}$  are fixed, let  $f$  be the hinge-loss and we focus on the case of quadratic activation where  $\phi(t) = t^2/2$ . For convenience, we denote the empirical loss for task  $k$  by  $\widehat{F}_k(w) := \widehat{F}(w, \mathcal{D}_k)$ , and the corresponding population (test) loss by  $F_k(w) := F(w, \bar{\mathcal{D}}_k) = \mathbb{E}_{(x,y) \sim \bar{\mathcal{D}}_k} [f(y \Phi(w, x))]$ , where the expectation is taken over the test-set distribution  $\bar{\mathcal{D}}_k$ .

The complete continual learning procedure is summarized in Algorithm 1. We initialize the parameter vector  $w_1^{(0)}$  from a standard Gaussian distribution,  $w_1^{(0)} \sim \mathcal{N}(0, I_p)$ , where  $p = md$  is the total number of trainable parameters in the first layer. For each task  $k \in \{1, \dots, K\}$ , we train the network starting from initialization  $w_{k-1}^{(T)}$  for  $T$  gradient descent updates on  $\widehat{F}_k$ . The resulting vector after finishing the training on task  $k$  is denoted by  $w_k := w_k^{(T)} := w_{k+1}^{(0)}$ , and it serves as the initialization for the subsequent task  $k+1$ . After processing all  $K$  tasks, the algorithm outputs the final parameter vector  $w_K$ , which contains the accumulated knowledge obtained from the entire sequence of tasks.

### 2.1.2 XOR CLUSTER DATASET

Consider data according to the XOR cluster distribution with Gaussian noise where  $x \in \mathbb{R}^d, y \in \{\pm 1\}$  and

$$x \sim \begin{cases} \frac{1}{2}\mathcal{N}(\mu_+, \sigma^2 I_d) + \frac{1}{2}\mathcal{N}(-\mu_+, \sigma^2 I_d) & \text{if } y = 1, \\ \frac{1}{2}\mathcal{N}(\mu_-, \sigma^2 I_d) + \frac{1}{2}\mathcal{N}(-\mu_-, \sigma^2 I_d) & \text{if } y = -1, \end{cases} \quad (1)$$

where  $\mu_+ \perp \mu_-$ , and  $\Pr[y = 1] = \Pr[y = -1] = 1/2$ . This dataset serves as a representative example of a realizable, not linearly separable problem that is well-suited for analyzing neural networks. The XOR cluster and its Boolean variant (known as parities) have been extensively studied in the deep learning theory literature (Wei et al., 2019; Refinetti et al., 2021; Xu et al., 2024; Telgarsky, 2023; Taheri & Thrampoulidis, 2024; Glasgow, 2024; Taheri et al., 2025). In particular, the XOR model is a representative instance of multi-index models, which have recently been used to investigate the sample complexity of neural network learning (Damian et al., 2022; Ba et al., 2022; Abbe et al., 2022). For this data set, we show that  $d^2$  samples and  $d^4$  neurons are sufficient to achieve near zero train and test loss (see Prop. 2 in App. A).

For the continual learning setup we consider a stream of  $K$  tasks, where each task is generated according to the XOR cluster dataset, that is, for task  $k$ :

$$x \sim \begin{cases} \frac{1}{2}\mathcal{N}(\mu_+^k, \sigma^2 I_d) + \frac{1}{2}\mathcal{N}(-\mu_+^k, \sigma^2 I_d) & \text{if } y = 1, \\ \frac{1}{2}\mathcal{N}(\mu_-^k, \sigma^2 I_d) + \frac{1}{2}\mathcal{N}(-\mu_-^k, \sigma^2 I_d) & \text{if } y = -1. \end{cases} \quad (2)$$

We assume that  $\mu_+^k$  and  $\mu_-^k$  are mutually orthogonal for all  $k \in [K]$ , with  $\|\mu_+^k\| = \|\mu_-^k\| = \Theta(\frac{1}{\sqrt{d}})$ ,  $\Pr[y = 1] = \Pr[y = -1] = 1/2$ , and noise level  $\sigma = \Theta(\frac{1}{\log^c(d)\sqrt{d}})$  for some universal constant  $c$ . The orthogonality assumption reflects the fact that tasks are not correlated. Although our analysis can be extended to the more general case where the mean vectors are not orthogonal between tasks,

this is beyond the scope of the present work. We further assume that the number of tasks grows at most poly-logarithmically with the data dimension, i.e.,  $K = \tilde{O}_d(1)$ .

**Forgetting and Continual Learning.** Let  $w_k$  denote the weights after training with data from task  $k$  for some  $k \in [K]$ . *Test-time forgetting* is measured by the increase in test loss for the  $k$ th task after training on  $K - k$  subsequent tasks:

$$\text{Test-time Forgetting: } \mathcal{F}_{k,K}^{\text{ts}} := F_k(w_K) - F_k(w_k).$$

We can decompose the test-time forgetting as follows:

$$\mathcal{F}_{k,K}^{\text{ts}} = [F_k(w_K) - \hat{F}_k(w_K)] + [\hat{F}_k(w_K) - \hat{F}_k(w_k)] + [\hat{F}_k(w_k) - F_k(w_k)].$$

In the interpolating regime where the network can achieve zero training loss, we can drop the last term and bound the test-time forgetting based on *generalization gap* and *training loss*:

$$\mathcal{F}_{k,K}^{\text{ts}} \leq \underbrace{[\hat{F}_k(w_K) - \hat{F}_k(w_k)]}_{\text{Train-time forgetting } \mathcal{F}_{k,K}^{\text{tr}}} + \underbrace{[\hat{F}_k(w_k) - F_k(w_k)]}_{\text{Delayed generalization gap}}. \quad (3)$$

In the following section, we discuss each term separately. When combined, these will give an upper bound on the expected test-time forgetting.

## 2.2 TRAIN AND TEST-TIME FORGETTING BOUNDS

The following theorem provides closed-form bounds on the train-time forgetting of task  $k$  after learning the subsequent  $K - k$  tasks (for a total of  $K$  tasks). We assume the hinge loss,  $f(u) = \max\{1 - u, 0\}$ , and adopt the data distribution specified in Eq. 2. The proofs for the theorems in this section are deferred to the appendix.

**Theorem 1** (Train-time forgetting). *Consider the  $d$ -dimensional XOR cluster dataset with  $K$  tasks and assume gradient descent with  $\eta T = \Theta(d^2)$  iterations and  $n = \tilde{\Theta}(d^2 K)$  samples for each subsequent task trained by a neural net with  $m = \tilde{\Omega}(d^8 K^4)$  hidden neurons. Then, with high probability, the train-time forgetting is  $\mathcal{F}_{k,K}^{\text{tr}} = o_d(1)$ . In particular, with probability  $1 - \delta$ , we have:*

$$|\mathcal{F}_{k,K}^{\text{tr}}| := |\hat{F}_k(w_K) - \hat{F}_k(w_k)| = \tilde{O} \left( \eta T \frac{\sqrt{K-k}}{d\sqrt{n}} + \eta T \frac{\sqrt{K-k}}{d^2 \text{poly log}(d)} + \eta^2 T^2 \frac{K^2}{\sqrt{m}} \right), \quad (4)$$

where  $\tilde{O}(\cdot)$  hides logarithmic factors in  $n, T$  and  $\delta$ .

The first and third terms in Eq. 4 capture the effects of sample size and hidden-layer width. Importantly, neither factor alone is sufficient to eliminate train-time forgetting. However, with sufficiently large  $n$  and  $m$ , we obtain a forgetting rate  $\mathcal{F}_{k,K}^{\text{tr}} = O(1/\text{poly log}(d)) = o_d(1)$ . Here,  $n$  denotes the sample size of datasets learned after task  $k$ . Although these subsequent tasks are independent of and orthogonal to task  $k$  (tasks are IID with orthogonal means), their larger training sets nevertheless enhance the overall continual learning process. Our experiments in Section 3, conducted across different activation functions, loss functions, and datasets under various problem settings, empirically confirm the theoretical roles of network width, sample size, and the number of tasks.

We note that the early-stopping choice  $\eta T = \tilde{\Theta}(n)$  is standard in the deep learning literature, particularly in the interpolation regime for single-task settings (Ji & Telgarsky, 2020; Lei & Ying, 2020a), as it ensures the training loss is driven close to zero. As the following theorem demonstrates, under this choice the training loss remains uniformly small across all tasks.

**Theorem 2** (Train error in continual learning). *Let the assumptions of Theorem 1 hold. Then, after  $KT$  iterations of GD, with high probability, the misclassification train error and train loss are  $o_d(1)$  uniformly for all  $K$  tasks.*

The proofs of Theorems 1-2 are deferred to App. C. A combination of these theorems yields sufficient conditions for successful continual learning as measured by training performance. We remark that the proof of both theorems, up to calculations related to the model-output's equations in Eq.

14 or forgetting equation in Eq. 16, hold for a broad family of data distributions. These steps require no special structure beyond concentration of the empirical NTK and uniform boundedness of inputs. The parts of the analysis that specialize to the XOR-cluster distribution primarily arise when deriving explicit closed-form expressions for the model output and for characterizing closed-form bounds for forgetting. Extending the bounds to more general data distributions (e.g. other clustered multi-index models) would therefore require replacing the concentration steps and explicit calculations with distribution-specific estimates. We expect the qualitative dependencies on  $(n, m, T, \eta, K)$  to remain similar under other clustered or sub-Gaussian task distributions, but the exact forms will change.

Our next result derives the delayed generalization gap (as defined in Eq. 3) for almost any data distribution. In fact, it also shows that the above assumptions for  $m, n$  and  $T$  are also sufficient for good continual *test-time* performance for the XOR cluster dataset.

**Theorem 3** (Delayed generalization gap). *Assume the loss function is 1-Lipschitz and 1-smooth. Then, the expected delayed generalization gap satisfies,*

$$\mathcal{F}_{k,K}^{\text{gen}} := \mathbb{E}_{\mathcal{D}_k} \left[ F_k(w_K) - \widehat{F}_k(w_K) \right] \lesssim \frac{\eta T e^{\frac{\eta T (K-k+1)}{\sqrt{m}}}}{n}.$$

**Remark 1** (Test-time forgetting). *Note that the gap decays with the rate  $1/n$  and similar to the train-time forgetting, given sufficiently large width, it is linearly proportional to the number of iterations. While the dependence on  $T$  is unfavorable, and in general we expect a time-independent generalization gap, we note that with the training loss guarantees from Theorems 1-2, and in view of Theorem 3 we find that with  $n = \widetilde{\Theta}(d^2 K) = \widetilde{\Theta}(\eta T)$  samples and with  $m = \widetilde{\Omega}(d^8 K^4)$ , it holds  $\mathcal{F}_{k,K}^{\text{gen}} = o_d(1)$  resulting in vanishing test-time forgetting in view of Eq. 3. Finally, we note -as the proof shows- training occurs within the linear region of the hinge loss, which allows us to combine the results of the previous theorems despite the smoothness assumption on the loss in Theorem 3.*

Under additional conditions on continual learnability of each task and a self-bounded assumption for the loss function (i.e.,  $|f'(u)| < f(u)$ ) that includes logistic loss  $f(u) = \log(1 + \exp(-u))$ , in the next theorem, we prove a tighter generalization bound, which has a noticeably milder dependence on  $T$  compared to Theorem 3.

**Theorem 4** (Improved gen. gap). *Assume the loss function is self-bounded, 1-Lipschitz and 1-smooth. Let the network's width  $m$  be large enough so that  $\sqrt{m} \gtrsim \eta \sum_{j=k+1}^K \sum_{t=0}^{T-1} \widehat{F}_j(w_j^{(t)})$ .*

*Moreover, assume there exists  $w_k^*$  achieving small training loss  $\widehat{F}_k(w_k^*) \leq \|w_k^* - w_k^{(0)}\|^2 / (\eta T)$  for task  $k$ , and satisfying  $m \gtrsim \|w_k^* - w_k^{(0)}\|^4$ . Then,*

$$\mathcal{F}_{k,K}^{\text{gen}} \lesssim \frac{\eta}{n} \mathbb{E}_{\mathcal{D}_k} \left[ e^{\frac{\eta}{\sqrt{m}} c_{k,K}} \sum_{t=0}^{T-1} \widehat{F}_k(w_k^{(t)}) \right], \quad (5)$$

where  $c_{k,K} = O\left(\sum_{j=k+1}^K \sum_{t=0}^{T-1} \widehat{F}_j(w_j^{(t)})\right)$ .

As the result shows,  $\mathcal{F}_{k,K}^{\text{gen}}$  decays with both the cumulative training loss of the later tasks as in  $c_{k,K}$  and the network width, and it is proportional to the cumulative training loss of task  $k$ . In particular, the cumulative training loss can be much smaller than  $T$ , potentially leading to tighter bounds compared to the results of previous theorem.

**Remark 2.** *In words, the conditions on  $\|w_k^* - w_k^{(0)}\|$  ensure that task  $k$  remains learnable in the kernel regime, i.e., the initialization is sufficiently close to the task-specific optimum so that optimization can succeed. To better interpret this result, let us consider the case where  $k = 1$ , and we are interested in bounds on  $\mathcal{F}_{1,K}^{\text{gen}}$  for some  $K \geq 2$ . First, we note that for the XOR cluster dataset, there exists (see Proposition 2 in App. A)  $w_1^*$  such that  $\|w_1^* - w_1^{(0)}\| = \Theta(d \cdot \log(T))$  and  $\widehat{F}_1(w_1^*) \leq \frac{1}{T}$ , leading to train-loss  $\widehat{F}_1(w_1^{(t)}) = O\left(\frac{d^2 \log^2(t)}{t}\right)$ . Therefore, in view of Theorem 4, if  $\sqrt{m} \gtrsim \eta \sum_{j=2}^K \sum_{t=0}^{T-1} \widehat{F}_j(w_j^{(t)})$  and  $m \gtrsim d^4 \log^4(T)$ , the expected generalization gap after  $T$  iterations for each of  $K$  tasks satisfies,*

$$\mathcal{F}_{1,K}^{\text{gen}} \lesssim \frac{\eta d^2 \log^3(T)}{n},$$

where we can hide the exponential term in Eq. 5 for simplicity since the exponent is constant under the condition on  $m$ . This shows that Theorem 4 may lead to bounds with significantly better dependence based on  $T$  compared to Theorem 3 (poly-logarithmic vs linear). Although this result cannot be combined directly with our setting for the training loss (since the hinge loss considered for the training-loss analysis is not self-bounded) it still provides valuable insight. In particular, it can be interpreted as a stronger extension of Theorem 3, highlighting how the training loss directly influences the generalization gap in continual learning as shown by Eq. 5.

### 2.3 REGULARIZED CONTINUAL LEARNING

We consider the regularized continual learning algorithm (Aljundi et al., 2017; Kirkpatrick et al., 2017; Lewkowycz & Gur-Ari, 2020) with parameter  $\lambda$  where for each task  $k \geq 2$ , the objective is to minimize the following,

$$\min_w \widehat{F}_k(w) + \frac{\lambda}{2} \|w - w_{k-1}\|^2. \quad (6)$$

The regularization parameter  $\lambda$  can be chosen to be fixed, time-varying or data-dependent (Evron et al., 2023; Lewkowycz & Gur-Ari, 2020; Kirkpatrick et al., 2017). In the next proposition, we consider the fixed  $\lambda$  in order to study the effects of regularization on the GD iterates. We show that in the linearized regime (i.e., the infinite-width regime) where the network output can be written as a first-order approximation around initialization, the regularized continual learning problem is effectively equivalent to unregularized minimization with a time-varying step-size.

**Proposition 1** (Regularized continual learning). *Consider the regularized continual learning problem Eq.6 in the linearized regime, with the same setup as Theorem 1. The iterates of this algorithm with step-size  $\eta$  are equivalent to unregularized continual learning with step-size  $\tilde{\eta}_T$  for any task  $k \geq 2$ , where we define  $\tilde{\eta}_T := \frac{\alpha_T \eta}{T}$  and  $\alpha_T := \frac{1 - (1 - \eta \lambda)^T}{\eta \lambda}$ .*

Hence, as  $T$  increases, the effective step-size decreases, preventing iterations from moving a significant distance from the solution of previous task. The above result shows that in our setup with kernel regime and early stopping, regularized continual learning is equivalent to the unregularized one with a different step-size, implying that regularization cannot improve the results of the previous section.

## 3 EXPERIMENTS

We demonstrate the impact of sample size, number of tasks, and network width on the performance of continual learning for different loss functions, activations functions, data distributions, architectures, step-sizes and training horizons. We include the implementation details for each figure and additional experiments, including experiments on the MNIST dataset as well as transformer architecture, in Appendix E.

**Impact of sample-size, training horizon and number of Tasks** The first data model we consider is the XOR cluster (Section 2.1) with orthogonal mean vectors. Figure 1 shows how sample-size affects the train-loss forgetting for  $K = 3$  tasks using quadratic activation and linear loss. Here, we increase the sample size for each task from  $n = 2500$  to  $n = 5000$ , showing how the increase can diminish test-error forgetting. Figure 8 in the appendix repeats this experiment for different problem parameters. The observations from both plots are in-line with our theoretical insights on the role of sample-size on train and test time forgetting.

In order to verify the role of sample size of later tasks on train-time forgetting, we consider an experiment where the sample-size for task 1 is fixed, and for later tasks we increase the sample-size. The resulting training loss curves for different loss functions and activations are shown in Figures 2,3, and 9 (in the appendix). In accordance with Theorem 1, it can be observed that increasing the sample-size on tasks 2,3 has a positive influence on the forgetting of task 1. This implies that increasing the sample-size not only stabilizes the per-task training loss, but also reduces the amount of forgetting for previous tasks. While we use linear loss with quadratic activation for Figure 2, Figures 3, 9 indicate these observations extend to different losses and activations including the commonly used logistic loss and the ReLU and GELU activations.

In Figure 4, we consider  $K = 6$  tasks of the XOR cluster dataset and increase  $T$  from  $T = 2000$  to  $T = 4000$  for each task with  $n = 200, 800, 2000$  samples per each task. Note that increasing  $T$ , deteriorates the training loss for task 1 as training progresses. While increasing  $T$  helps with training loss for task 1 at the end of training of task 1, (the dashed lines are below the solid lines at  $k = 1$  for any value of  $n$ ), the amount of increase in the training loss for  $T = 4000$  is larger than  $T = 2000$ , eventually leading to larger training loss for task 1 as  $K$  increases. The right panel in Figure 4 shows the training loss for each task during learning these 6 tasks, illustrating that the train loss achieves near zero training loss for each task. On the other hand, increasing  $n$  for each task, helps with diminishing the training loss. To better see this impact, in Figure 10 in the appendix, we increase the number of tasks and consider learning  $K = 15$  and  $K = 20$  tasks of the XOR cluster dataset. These plots again verify our insights on the role of training-set size. The impact of increasing tasks is also visible in the Left figure while using GELU activation and the logistic loss.

**Impact of over-parameterization.** In Figure 5 we consider the XOR cluster dataset for  $K = 3$  tasks with Quadratic activation and gradually increase  $m$  from  $m = 10^2$  to  $m = 10^4$ . We find that

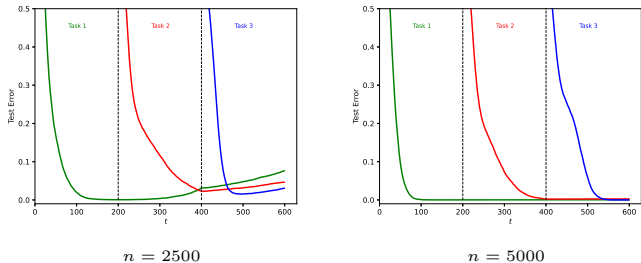

Figure 1: Classification test error for each task vs iterations for the XOR cluster with  $K = 3$  tasks trained on a quadratic network with  $n = 2500$ (left) and  $n = 5000$ (right) training samples per task.

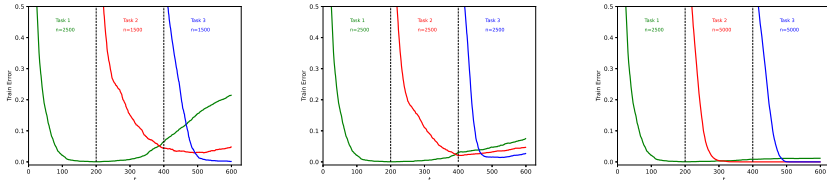

Figure 2: Classification train error for each task vs iterations for the XOR cluster with  $K = 3$  tasks trained on a quadratic network. We fix  $n = 2500$  for the first task and increase the sample size of second and third tasks across figures. Increasing the sample-size stabilizes per-task training and decreases forgetting for previous tasks.

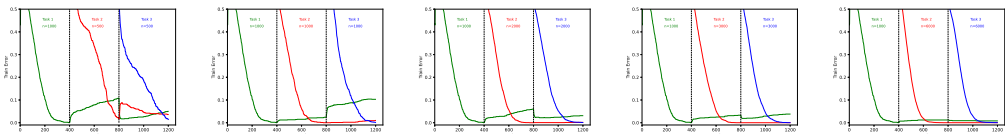

Figure 3: We repeat the experiment from Figure 2, this time using GELU activation and logistic loss function, demonstrating that our findings remain valid across different settings.

432  
433  
434  
435  
436  
437  
438  
439  
440  
441

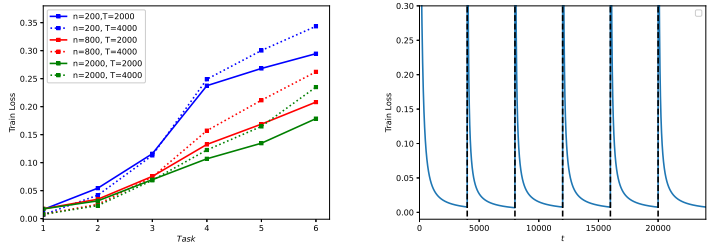

Figure 4: Left: Training loss of task 1 versus task index (i.e.,  $\hat{F}_1(w_k)$  as a function of  $k$ ) for  $K = 6$  tasks for different sample-sizes and training horizons per task. Right: Training loss per task ( $\hat{F}_k(w_k^{(t)})$ ) versus iteration when  $n = 2000, T = 4000$  for each task. We use GELU activation and logistic loss. While each task individually attains near-zero training loss, the training loss for the first task grows with both the number of tasks ( $K$ ) and the number of iterations ( $T$ ).

442  
443  
444  
445  
446  
447  
448  
449

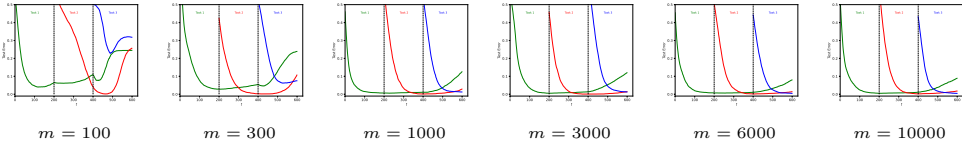

Figure 5: Impact of network width ( $m$ ) on the test error for learning the XOR cluster distribution with 3 tasks with quadratic networks. Increasing width helps with continual learning, however the benefits diminish as  $m$  grows.

450  
451  
452  
453  
454  
455  
456  
457  
458  
459  
460  
461  
462  
463  
464  
465  
466  
467  
468  
469  
470  
471  
472

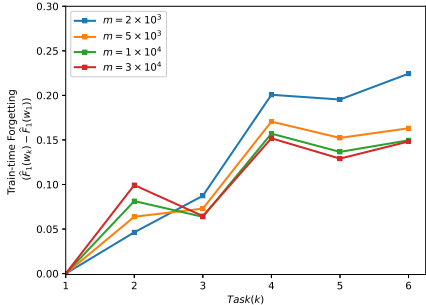

Figure 6: Train-time forgetting for task 1 vs task for  $K = 6$  total tasks of the XOR cluster dataset for different over-parameterization choices. Here we use GELU activation and Logistic loss and set  $T = 10^3$  for each task.

473  
474  
475  
476  
477  
478  
479  
480  
481  
482  
483  
484  
485

increasing the width is generally beneficial for continual learning. However the benefits shrink as  $m$  increases, where increasing the width from  $m = 10^3$  to  $m = 10^4$  has almost non-tangible impact on the overall performance of continual learning. Note that this is in line with Theorem 1, as we discussed the impact of width showing that width alone cannot reduce the train time forgetting to zero. We remark these insights also align with the *diminishing returns of width* phenomenon observed in previous works (Guha & Lakshman, 2024; Graldi et al., 2024) where the benefits of width decline as  $m$  grows. In Figure 6, we consider learning  $K = 6$  tasks with the GELU activation and logistic loss for different choices of over-parameterization. The observations in this figure again verify our previous insights as increasing the width helps with continual learning, although it alone cannot lead to forget-less continual learning.

#### 4 CONCLUSIONS AND FUTURE WORK

We studied gradient-based continual learning in a neural network setup, highlighting how different problem parameters affect catastrophic forgetting. Our analysis provides the first closed-form bounds on train and test time forgetting in this setting and clarifies the roles of sample size, width, number of tasks, and training horizon. There are several promising directions for future work. An immediate next step is to analyze other training methodologies, such as (mini-batch) stochastic gradient descent, where additional noise may interact with forgetting. Another important direction is to move beyond the quadratic two-layer setting and explore whether analogous guarantees can be obtained for richer architectures, including transformers. Our preliminary experiments in Figure 12 in the appendix show that some aspects of our results are observed, particularly for small transformers with Gaussian-Mixture data. Finally, our current analysis is limited to the lazy regime. Extending the theory to the feature-learning regime, where step-sizes are large, early stopping is avoided, and weights move significantly from their initialization, remains a challenging and exciting problem. While a recent work (Graldi et al., 2024) provides preliminary results on the drawbacks of feature learning for continual learning, more exploration in this regime could provide a more complete picture of continual learning in modern machine learning.

## REFERENCES

- 540  
541  
542 Emmanuel Abbe, Enric Boix Adsera, and Theodor Misiakiewicz. The merged-staircase property: a  
543 necessary and nearly sufficient condition for sgd learning of sparse functions on two-layer neural  
544 networks. In *Conference on Learning Theory*, pp. 4782–4887. PMLR, 2022.
- 545 Rahaf Aljundi, Francesca Babiloni, Mohamed Elhoseiny, Marcus Rohrbach, and Tinne Tuytelaars.  
546 Memory aware synapses: Learning what (not) to forget. *ArXiv*, abs/1711.09601, 2017. URL  
547 <https://api.semanticscholar.org/CorpusID:4254748>.
- 548 Joshua Andle and Salimeh Yasaei Sekeh. Theoretical understanding of the information flow on  
549 continual learning performance. In *Proceedings of the European Conference on Computer Vision*  
550 *(ECCV) 2022*, pp. 86–101, 2022. URL [https://www.ecva.net/papers/eccv\\_2022/  
551 papers\\_ECCV/papers/136720085.pdf](https://www.ecva.net/papers/eccv_2022/papers_ECCV/papers/136720085.pdf).
- 552 Jimmy Ba, Murat A Erdogdu, Taiji Suzuki, Zhichao Wang, Denny Wu, and Greg Yang. High-  
553 dimensional asymptotics of feature learning: How one gradient step improves the representation.  
554 *Advances in Neural Information Processing Systems*, 35:37932–37946, 2022.
- 555 Mohammadamin Banayeeanzade, Mahdi Soltanolkotabi, and Mohammad Rostami. Theoretical in-  
556 sights into overparameterized models in multi-task and replay-based continual learning. *Transac-  
557 tions on Machine Learning Research*, 2024.
- 558 Peter L. Bartlett, Andrea Montanari, and Alexander Rakhlin. Deep learning: a statistical viewpoint.  
559 *Acta Numerica*, 30:87 – 201, 2021.
- 560 Ari S. Benjamin, Christian Pehle, and Kyle Daruwalla. Continual learning with the  
561 neural tangent ensemble. In *Proceedings of the 37th Conference on Neural In-  
562 formation Processing Systems (NeurIPS 2024)*, pp. 58816–58840, 2024. URL  
563 [https://proceedings.neurips.cc/paper\\_files/paper/2024/file/  
564 6bf333d4ca7c7f6fe6e301b2a3160163-Paper-Conference.pdf](https://proceedings.neurips.cc/paper_files/paper/2024/file/6bf333d4ca7c7f6fe6e301b2a3160163-Paper-Conference.pdf).
- 565 Mehdi Abbana Bennani, Thang Doan, and Masashi Sugiyama. Generalisation guarantees for con-  
566 tinual learning with orthogonal gradient descent. *arXiv preprint arXiv:2006.11942*, 2020.
- 567 Olivier Bousquet and André Elisseeff. Stability and generalization. *Journal of Machine Learning*  
568 *Research (JMLR)*, 2:499–526, 2002.
- 569 Xinyuan Cao, Weiyang Liu, and Santosh S. Vempala. Provable lifelong learning of representations.  
570 In *Proceedings of the 25th International Conference on Artificial Intelligence and Statistics (AIS-  
571 TATS) 2022*, volume 151 of *Proceedings of Machine Learning Research*, pp. 6334–6356. PMLR,  
572 March 2022. URL <https://proceedings.mlr.press/v151/cao22a.html>.
- 573 Alexandru Damian, Jason Lee, and Mahdi Soltanolkotabi. Neural networks can learn representations  
574 with gradient descent. In *Conference on Learning Theory*, pp. 5413–5452. PMLR, 2022.
- 575 Thang Doan, Mehdi Abbana Bennani, Bogdan Mazoure, Guillaume Rabusseau, and Pierre Alquier.  
576 A theoretical analysis of catastrophic forgetting through the ntk overlap matrix. In *International  
577 Conference on Artificial Intelligence and Statistics*, pp. 1072–1080. PMLR, 2021.
- 578 Simon Du, Jason Lee, Haochuan Li, Liwei Wang, and Xiyu Zhai. Gradient descent finds global  
579 minima of deep neural networks. In *International conference on machine learning*, pp. 1675–  
580 1685. PMLR, 2019.
- 581 Itay Evron, Edward Moroshko, Gon Buzaglo, Maroun Khriesh, Badea Marjeh, Nathan Srebro, and  
582 Daniel Soudry. Continual learning in linear classification on separable data. In *International  
583 Conference on Machine Learning*, pp. 9440–9484. PMLR, 2023.
- 584 Vitaly Feldman and Jan Vondrak. High probability generalization bounds for uniformly stable al-  
585 gorithms with nearly optimal rate. In *Conference on learning theory*, pp. 1270–1279. PMLR,  
586 2019.
- 587 Behrooz Ghorbani, Song Mei, Theodor Misiakiewicz, and Andrea Montanari. Limitations of lazy  
588 training of two-layers neural network. *Advances in Neural Information Processing Systems*, 32,  
589 2019.
- 590  
591  
592  
593

- 594 Margalit Glasgow. Sgd finds then tunes features in two-layer neural networks with near-optimal  
595 sample complexity: A case study in the xor problem. In *International Conference on Learning*  
596 *Representations*, 2024.
- 597 Daniel Goldfarb and Paul Hand. Analysis of catastrophic forgetting for random orthogonal trans-  
598 formation tasks in the overparameterized regime. In *International Conference on Artificial Intel-*  
599 *ligence and Statistics*, pp. 2975–2993. PMLR, 2023.
- 600 Ian J Goodfellow, Mehdi Mirza, Da Xiao, Aaron Courville, and Yoshua Bengio. An empiri-  
601 cal investigation of catastrophic forgetting in gradient-based neural networks. *arXiv preprint*  
602 *arXiv:1312.6211*, 2013.
- 603 Jacopo Galdi, Giulia Lanzillotta, Lorenzo Noci, Benjamin F Grewe, and Thomas Hofmann. To  
604 learn or not to learn: Exploring the limits of feature learning in continual learning. In *NeurIPS*  
605 *2024 Workshop on Scalable Continual Learning for Lifelong Foundation Models*, 2024. URL  
606 <https://openreview.net/forum?id=TYPBYgWYw8>.
- 607 Etash Kumar Guha and Vihan Lakshman. On the diminishing returns of width for continual learning.  
608 In *International Conference on Machine Learning*, pp. 16706–16730. PMLR, 2024.
- 609 Moritz Hardt, Ben Recht, and Yoram Singer. Train faster, generalize better: Stability of stochastic  
610 gradient descent. In *International Conference on Machine Learning (ICML)*, volume 48, pp.  
611 1225–1234, 2016.
- 612 Arthur Jacot, Franck Gabriel, and Clement Hongler. Neural tangent kernel: Convergence and gen-  
613 eralization in neural networks. In *Neural Information Processing Systems (NeurIPS)*, volume 31,  
614 2018.
- 615 Ziwei Ji and Matus Telgarsky. Polylogarithmic width suffices for gradient descent to achieve arbi-  
616 trarily small test error with shallow relu networks. *International Conference on Learning Repre-*  
617 *sentations*, 2020.
- 618 Ryo Karakida and Shotaro Akaho. Learning curves for continual learning in neural networks: Self-  
619 knowledge transfer and forgetting. In *International Conference on Learning Representations*,  
620 2021.
- 621 James Kirkpatrick, Razvan Pascanu, Neil Rabinowitz, Joel Veness, Guillaume Desjardins, Andrei A.  
622 Rusu, Kieran Milan, John Quan, Tiago Ramalho, Agnieszka Grabska-Barwinska, Demis Hass-  
623 abis, Claudia Clopath, Dharshan Kumaran, and Raia Hadsell. Overcoming catastrophic forgetting  
624 in neural networks. *Proceedings of the National Academy of Sciences*, 114(13):3521–3526, 2017.  
doi: 10.1073/pnas.1611835114.
- 625 Sebastian Lee, Sebastian Goldt, and Andrew Saxe. Continual learning in the teacher-student setup:  
626 Impact of task similarity. In *International Conference on Machine Learning*, pp. 6109–6119.  
627 PMLR, 2021.
- 628 Yunwen Lei and Yiming Ying. Fine-grained analysis of stability and generalization for stochastic  
629 gradient descent. In *International Conference on Machine Learning (ICML)*, volume 119, pp.  
630 5809–5819, 2020a.
- 631 Yunwen Lei and Yiming Ying. Sharper generalization bounds for learning with gradient-dominated  
632 objective functions. In *International Conference on Learning Representations (ICLR)*, 2020b.
- 633 Aitor Lewkowycz and Guy Gur-Ari. On the training dynamics of deep networks with l2 regu-  
634 larization. *ArXiv*, abs/2006.08643, 2020. URL [https://api.semanticscholar.org/](https://api.semanticscholar.org/CorpusID:228082770)  
635 [CorpusID:228082770](https://api.semanticscholar.org/CorpusID:228082770).
- 636 Boqi Li, Youjun Wang, and Weiwei Liu. Towards understanding catastrophic forgetting in two-  
637 layer convolutional neural networks. In Aarti Singh, Maryam Fazel, Daniel Hsu, Simon Lacoste-  
638 Julien, Felix Berkenkamp, Tegan Maharaj, Kiri Wagstaff, and Jerry Zhu (eds.), *Proceedings of*  
639 *the 42nd International Conference on Machine Learning (ICML 2025)*, volume 267 of *Pro-*  
640 *ceedings of Machine Learning Research*, pp. 36057–36095. PMLR, July 2025. URL [https://](https://proceedings.mlr.press/v267/li25cm.html)  
641 [proceedings.mlr.press/v267/li25cm.html](https://proceedings.mlr.press/v267/li25cm.html).

- 648 Zhizhong Li and Derek Hoiem. Learning without forgetting. *IEEE transactions on pattern analysis*  
649 *and machine intelligence*, 40(12):2935–2947, 2017.
- 650
- 651 Sen Lin, Peizhong Ju, Yingbin Liang, and Ness Shroff. Theory on forgetting and generalization of  
652 continual learning. In *International Conference on Machine Learning*, pp. 21078–21100. PMLR,  
653 2023.
- 654 Michael McCloskey and Neal J. Cohen. Catastrophic interference in connectionist networks: The  
655 sequential learning problem. volume 24 of *Psychology of Learning and Motivation*, pp. 109–165.  
656 Academic Press, 1989. doi: [https://doi.org/10.1016/S0079-7421\(08\)60536-8](https://doi.org/10.1016/S0079-7421(08)60536-8). URL <https://www.sciencedirect.com/science/article/pii/S0079742108605368>.
- 657
- 658 Seyed Iman Mirzadeh, Arslan Chaudhry, Dong Yin, Huiyi Hu, Razvan Pascanu, Dilan Gorur, and  
659 Mehrdad Farajtabar. Wide neural networks forget less catastrophically. In *International confer-*  
660 *ence on machine learning*, pp. 15699–15717. PMLR, 2022a.
- 661
- 662 Seyed Iman Mirzadeh, Arslan Chaudhry, Dong Yin, Timothy Nguyen, Razvan Pascanu, Dilan  
663 Gorur, and Mehrdad Farajtabar. Architecture matters in continual learning. *arXiv preprint*  
664 *arXiv:2202.00275*, 2022b.
- 665
- 666 Atsushi Nitanda, Geoffrey Chinot, and Taiji Suzuki. Gradient descent can learn less  
667 over-parameterized two-layer neural networks on classification problems. *arXiv preprint*  
668 *arXiv:1905.09870*, 2019.
- 669
- 670 Maria Refinetti, Sebastian Goldt, Florent Krzakala, and Lenka Zdeborová. Classifying high-  
671 dimensional gaussian mixtures: Where kernel methods fail and neural networks succeed. In  
*International Conference on Machine Learning*, pp. 8936–8947. PMLR, 2021.
- 672
- 673 Dominic Richards and Ilja Kuzborskij. Stability & generalisation of gradient descent for shallow  
674 neural networks without the neural tangent kernel. In *Neural Information Processing Systems*  
675 (*NeurIPS*), 2021.
- 676
- 677 David Rolnick, Arun Ahuja, Jonathan Schwarz, Timothy Lillicrap, and Gregory Wayne. Experience  
replay for continual learning. *Advances in neural information processing systems*, 32, 2019.
- 678
- 679 Tom Schaul, John Quan, Ioannis Antonoglou, and David Silver. Prioritized experience replay. *In-*  
680 *ternational Conference on Learning Representations*, 2016.
- 681
- 682 Ali Sharif Razavian, Hossein Azizpour, Josephine Sullivan, and Stefan Carlsson. Cnn features off-  
683 the-shelf: an astounding baseline for recognition. In *Proceedings of the IEEE conference on*  
*computer vision and pattern recognition workshops*, pp. 806–813, 2014.
- 684
- 685 Hossein Taheri and Christos Thrampoulidis. Generalization and stability of interpolating neural  
686 networks with minimal width. *Journal of Machine Learning Research*, 25(156):1–41, 2024.
- 687
- 688 Hossein Taheri, Christos Thrampoulidis, and Arya Mazumdar. Sharper guarantees for learning  
689 neural network classifiers with gradient methods. In *The Thirteenth International Conference on*  
*Learning Representations*, 2025.
- 690
- 691 Matus Telgarsky. Feature selection and low test error in shallow low-rotation relu networks. In  
*International Conference on Learning Representations*, 2023.
- 692
- 693 Colin Wei, Jason D Lee, Qiang Liu, and Tengyu Ma. Regularization matters: Generalization and  
694 optimization of neural nets vs their induced kernel. *Advances in Neural Information Processing*  
695 *Systems*, 32, 2019.
- 696
- 697 Jonathan Wenger, Felix Dangel, and Agustinus Kristiadi. On the disconnect between theory and  
698 practice of neural networks: Limits of the ntk perspective. *arXiv preprint arXiv:2310.00137*,  
2023.
- 699
- 700 Zhiwei Xu, Yutong Wang, Spencer Frei, Gal Vardi, and Wei Hu. Benign overfitting and grokking  
701 in relu networks for xor cluster data. In *International Conference on Learning Representations*,  
2024.

## APPENDIX

## A SINGLE-TASK XOR CLUSTER

The next result derives the class margin for the single-task XOR cluster dataset and combined with standard results from the NTK literature it bounds the train and test loss for learning this dataset (as described by Eq. 1) with GD.

**Proposition 2** (Single-task XOR). *For the XOR cluster dataset for a given  $T$ , there exists target vector  $w^* \in \mathbb{R}^{dm}$  such that  $\|w^* - w_0\| = \Theta(d \cdot \log(T))$  and  $\widehat{F}(w^*) < 1/T$  and gradient descent with logistic loss and on a network with quadratic activation with width  $m = \Omega(\|w^* - w_0\|^4)$ , achieves the training loss  $\widehat{F}(w_t) = O(\frac{\|w^* - w_0\|^2}{t})$  and the expected test loss  $\mathbb{E}_{\mathcal{D}}[F(w_t)] = O(\frac{\|w^* - w_0\|^2}{n})$  after  $t = n$  GD iterations.*

*Proof.* Define four regions  $R_1, R_2, R_3, R_4 \in \mathbb{R}^d$  such that

$$\begin{aligned} R_1 &= \{x \in \mathbb{R}^d : x^\top(\mu_+ + \mu_-) > 0, x^\top(\mu_+ - \mu_-) > 0\}, \\ R_2 &= \{x \in \mathbb{R}^d : x^\top(\mu_+ + \mu_-) > 0, x^\top(\mu_+ - \mu_-) < 0\}, \\ R_3 &= \{x \in \mathbb{R}^d : x^\top(\mu_+ + \mu_-) < 0, x^\top(\mu_+ - \mu_-) > 0\}, \\ R_4 &= \{x \in \mathbb{R}^d : x^\top(\mu_+ + \mu_-) < 0, x^\top(\mu_+ - \mu_-) < 0\}. \end{aligned}$$

Without loss of generality, assume  $\mu_+ = [1/\sqrt{d}, 1/\sqrt{d}, 0, \dots, 0]$  and  $\mu_- = [-1/\sqrt{d}, 1/\sqrt{d}, 0, \dots, 0]$ . Our goal is to derive the NTK margin (Ji & Telgarsky, 2020; Taheri & Thrampoulidis, 2024) denoted by  $\gamma$  for infinitely wide neural networks with initialization variable  $z \in \mathbb{R}^d$ , i.e., show that the equation below holds for all data points in the training set almost surely:

$$M(x_i, y_i) := y_i \int_{z \in \mathbb{R}^d} \phi'(\langle z, x_i \rangle) \langle w_z, x_i \rangle d\mu_{\mathcal{N}}(z) \geq \gamma$$

where  $\mu_{\mathcal{N}}$  is the standard Gaussian measure and  $w_z$  is an initialization dependent vector such that  $\|w_z\| \leq 1$  for all  $z \in \mathbb{R}^d$ . We drop the subscript  $i$  and assume quadratic activation. Assume  $y = 1, x \sim \mathcal{N}(\mu_+, \sigma I_d)$  without loss of generality. Then,

$$\begin{aligned} M &= \int_{z \in R_1} \langle z, x \rangle \langle w_z, x \rangle d\mu_{\mathcal{N}}(z) + \int_{z \in R_2} \langle z, x \rangle \langle w_z, x \rangle d\mu_{\mathcal{N}}(z) \\ &\quad + \int_{z \in R_3} \langle z, x \rangle \langle w_z, x \rangle d\mu_{\mathcal{N}}(z) + \int_{z \in R_4} \langle z, x \rangle \langle w_z, x \rangle d\mu_{\mathcal{N}}(z) \end{aligned}$$

Let

$$w_z = \mu_+ / \|\mu_+\|, -\mu_- / \|\mu_-\|, \mu_- / \|\mu_-\|, -\mu_+ / \|\mu_+\| \text{ if } z \in R_1, R_2, R_3, R_4, \text{ respectively.}$$

Assume  $s \sim \mathcal{N}(0, \sigma I_d)$ .

$$\begin{aligned} &\langle \mu_+ / \|\mu_+\|, \mu_+ + s \rangle \int_{z \in R_1} \langle z, \mu_+ + s \rangle d\mu_{\mathcal{N}}(z) \\ &= (\|\mu_+\| + \mu_+^\top s / \|\mu_+\|) \left( \left( \frac{1}{\sqrt{d}} + s(1) \right) \int_{z \in R_1} z(1) d\mu_{\mathcal{N}}(z) + \left( \frac{1}{\sqrt{d}} + s(2) \right) \int_{z \in R_1} z(2) d\mu_{\mathcal{N}}(z) \right) \\ &= (\|\mu_+\| + \frac{\mu_+^\top s}{\|\mu_+\|}) \left( \frac{2}{\sqrt{d}} + s(1) + s(2) \right) \mathbb{E}[z(1) \mathbf{1}_{z(1) > 0}] \\ &= \left( \sqrt{\frac{2}{d}} + \frac{\sqrt{2}}{2} (s(1) + s(2)) \right) \left( \frac{2}{\sqrt{d}} + s(1) + s(2) \right) \frac{1}{\sqrt{2}} \\ &\gtrsim \left( \frac{1}{\sqrt{d}} + s(1) + s(2) \right)^2 \\ &\gtrsim \left( \frac{1}{\sqrt{d}} + O\left(\frac{1}{\sqrt{d} \cdot \log^c(d)}\right) \right)^2 \\ &\gtrsim 1/d. \end{aligned}$$

For the second integral we have,

$$\begin{aligned}
& \langle -\mu_- / \|\mu_-\|, \mu_+ + s \rangle \int_{z \in R_2} \langle z, \mu_+ + s \rangle d\mu_{\mathcal{N}}(z) \\
&= \frac{-\mu_-^\top s}{\|\mu_-\|} \left( \left( \frac{1}{\sqrt{d}} + s(1) \right) \int_{z \in R_2} z(1) d\mu_{\mathcal{N}}(z) + \left( \frac{1}{\sqrt{d}} + s(2) \right) \int_{z \in R_2} z(2) d\mu_{\mathcal{N}}(z) \right) \\
&= \frac{-1}{2} (s(2) - s(1))^2 = \Theta\left(\frac{1}{d \cdot \log^{2c}(d)}\right)
\end{aligned}$$

For the third and fourth integral, due to symmetry, we reach the above final results again. Overall, we find that

$$M(x_i, y_i) \gtrsim \frac{1}{d} + O\left(\frac{1}{d \cdot \text{poly} \log(d)}\right) = \Omega(1/d).$$

For data points coming from other three clusters of the XOR distribution, we reach the same conclusion. Therefore the margin scales as  $1/d$  for every training sample. Using this margin result in (Taheri & Thrampoulidis, 2024, Corollary C.1.1 and Proposition C.1) completes the result.  $\square$

## B PROOFS FOR BOUNDS ON DELAYED GENERALIZATION GAP

### B.1 PROOF OF THEOREM 4

**Theorem 5** (Restatement of Theorem 4). *Assume the loss function is 1-self-bounded, Lipschitz and smooth. Let the network’s width  $m$  be large enough so that  $\sqrt{m} \gtrsim \eta \sum_{j=k+1}^K \sum_{t=0}^{T-1} \widehat{F}_j(w_j^{(t)})$ . Moreover, assume  $w_k^*$  achieving small training loss for task  $k$  satisfying  $\|w_k^* - w_k^{(0)}\|^2 \geq \max\{\eta T \widehat{F}_k(w_k^*), \eta \widehat{F}_k(w_k^{(0)})\}$ , and  $m \gtrsim \|w_k^* - w_{k-1}^{(0)}\|^4$ . Then,*

$$\mathbb{E}_{\mathcal{D}_k} \left[ F_k(w_K) - \widehat{F}_k(w_K) \right] \leq \frac{\eta e^{\frac{\eta}{\sqrt{m}} c_{k,K}}}{n} \sum_{t=0}^{T-1} \mathbb{E}_{\mathcal{D}_k} \left[ \widehat{F}_k(w_k^{(t)}) \right],$$

where  $c_{k,K} = O\left(\sum_{j=k+1}^K \sum_{t=0}^{T-1} \widehat{F}_j(w_j^{(t)})\right)$ .

Recall the continual learning of  $K$  tasks for  $T$  iterations each i.e., at task  $k \in [K]$ :

$$w_t = w_{t-1} - \eta \nabla \widehat{F}_k(w_t) \text{ for } (k-1) \cdot T < t \leq k \cdot T$$

Assume  $f(\cdot, x)$  to be the sample loss which is  $L$ -Lipschitz with respect to its first input. Let  $\mathcal{D}_k := \{x_1, \dots, x_n\}$  be the training dataset of task  $k$ . Denote  $w_\ell^{-i}$  as the output of the continual learning algorithm after learning task  $\ell$  (for some  $\ell \leq K$ ), when  $x_i$  is left out of the training samples from  $\mathcal{D}_k$ . Similarly, we define  $w_\ell^{(t), -i}$ , as the output of continual learning at iteration  $t$  of task  $\ell$  when  $x_i$  is left out.

The generalization gap associated with task  $k$ , after learning  $K$  tasks can be written as,

$$\begin{aligned}
\mathbb{E}_{\mathcal{D}_k} [F_k(w_K) - \widehat{F}_k(w_K)] &= \frac{1}{n} \sum_{i=1}^n \mathbb{E}_{\mathcal{D}_{k,x}} [f(w_K, x) - f(w_K, x_i)] \\
&= \frac{1}{n} \sum_{i=1}^n \mathbb{E}_{\mathcal{D}_{k,x}} [f(w_K, x) - f(w_K^{-i}, x_i)] + \frac{1}{n} \sum_{i=1}^n \mathbb{E}_{\mathcal{D}_k} [f(w_K^{-i}, x_i) - f(w_K, x_i)] \\
&= \frac{1}{n} \sum_{i=1}^n \mathbb{E}_{\mathcal{D}_{k,x}} [f(w_K, x) - f(w_K^{-i}, x)] + \frac{1}{n} \sum_{i=1}^n \mathbb{E}_{\mathcal{D}_k} [f(w_K^{-i}, x_i) - f(w_K, x_i)] \\
&\leq \frac{L}{n} \sum_{i=1}^n \mathbb{E}_{\mathcal{D}_k} [\|w_K - w_K^{-i}\|]. \tag{7}
\end{aligned}$$

Therefore, the samples from the subsequent distributions do not impact the delayed generalization gap in Task  $k$ , as we are taking the expectation over only  $\mathcal{D}_k$ .

$$\|w_K - w_K^{-i}\| = \|w_K^{(T-1)} - \eta \nabla \widehat{F}_K(w_K^{(T-1)}) - (w_K^{(T-1),-i} - \eta \nabla \widehat{F}_K(w_K^{(T-1),-i}))\|$$

Note that the objectives are the same for both  $w_K^{(T-1),-i}$  and  $w_K^{(T-1)}$ . Therefore, by the non-expansive properties of one-hidden-layer neural nets (Taheri & Thrampoulidis, 2024, Lemma B.1):

$$\|w_K - w_K^{-i}\| \leq \left(1 + \frac{\eta LR^2}{\sqrt{m}} \max_{w_\alpha \in [w_K^{(T-1)}, w_K^{(T-1),-i}]} \widehat{F}'_K(w_\alpha)\right) \|w_K^{(T-1)} - w_K^{(T-1),-i}\| \quad (8)$$

where we define:

$$\widehat{F}'(w) := \frac{1}{n} \sum_{i=1}^n |f'(w, x_i)|,$$

with  $f'$  denoting the derivative of the sample loss. For self-bounded losses assumed in this theorem, we have  $|f'(w, x_i)| \leq f(w, x_i)$ , therefore  $\widehat{F}'_K(w_\alpha) \leq \widehat{F}_K(w_\alpha)$ , leading to:

$$\|w_K - w_K^{-i}\| \leq \left(1 + \frac{\eta LR^2}{\sqrt{m}} \max_{w_\alpha \in [w_K^{(T-1)}, w_K^{(T-1),-i}]} \widehat{F}_K(w_\alpha)\right) \|w_K^{(T-1)} - w_K^{(T-1),-i}\|$$

Repeating this step for  $T$  steps from  $T$  to 1:

$$\begin{aligned} \|w_K - w_K^{-i}\| &\leq \prod_{t=0}^{T-1} \left(1 + \frac{\eta LR^2}{\sqrt{m}} \max_{w_{\alpha t} \in [w_K^{(t)}, w_K^{(t),-i}]} \widehat{F}_K(w_{\alpha t})\right) \|w_K^{(0)} - w_K^{(0),-i}\| \\ &= \prod_{t=0}^{T-1} \left(1 + \frac{\eta LR^2}{\sqrt{m}} \max_{w_{\alpha t} \in [w_K^{(t)}, w_K^{(t),-i}]} \widehat{F}_K(w_{\alpha t})\right) \|w_K - w_K^{-i}\| \\ &\leq \exp\left(\frac{\eta LR^2}{\sqrt{m}} \sum_{t=0}^{T-1} \max_{w_{\alpha t} \in [w_K^{(t)}, w_K^{(t),-i}]} \widehat{F}_K(w_{\alpha t})\right) \|w_K - w_K^{-i}\|. \end{aligned}$$

where  $R$  is the max norm of data and  $L$  is the activation function's Lipschitz parameter. We need an inductive argument here to prove that  $\|w_t - w_t^{-i}\|$  remains bounded for all  $t$  as it is used in the max over  $w_{\alpha t}$  term.

Repeating this step for  $K - k$  tasks, we derive the following,

$$\|w_K - w_K^{-i}\| \leq \exp\left(\frac{\eta LR^2}{\sqrt{m}} \sum_{j=k+1}^K \sum_{t=0}^{T-1} \max_{w_{\alpha t} \in [w_j^{(t)}, w_j^{(t),-i}]} \widehat{F}_j(w_{\alpha t})\right) \|w_k - w_k^{-i}\|. \quad (9)$$

This gives an expression for bounding the generalization gap based on the parameter stability of the  $k'$ th task, the width and training performance from task  $k + 1$  to task  $K$ . To bound the parameter stability term, note that,

$$\begin{aligned} \|w_k - w_k^{-i}\| &\leq \left\| w_k^{(T-1)} - \eta \nabla \widehat{F}_k(w_k^{(T-1)}) - (w_k^{(T-1),-i} - \eta \nabla \widehat{F}_k(w_k^{(T-1),-i})) \right\| \\ &\quad + \eta \left\| \nabla \widehat{F}_k^i(w_k^{(T-1),-i}) \right\| \end{aligned}$$

Recall the  $i$ th data point is taken from the  $k$ th task data distribution. For tasks  $j$  where  $j < k$ , it holds that  $w_j = w_j^{-i}$ . Therefore we can use the result from previous works (Taheri & Thrampoulidis, 2024, Thm B.2) on the stability error of neural networks in the NTK regime to bound  $\|w_k - w_k^{-i}\|$ .

**Lemma 1.** *If there exists  $w_k^*$  such that  $\|w_k^* - w_k\| \geq \max\left\{\sqrt{\eta T \widehat{F}_k(w_k^*)}, \sqrt{\eta \widehat{F}_k(w_{k-1})}\right\}$ , and*

*$m \gtrsim \|w_k^* - w_k\|^4$ , then  $\|w_k - w_k^{-i}\| \lesssim \frac{\eta}{n} \sum_{t=0}^{T-1} \widehat{F}_k^i(w_k^{(t)})$ , and consequently,*

$$\mathbb{E}_{\mathcal{D}_k} \left[ \frac{1}{n} \sum_{i=1}^n \|w_k - w_k^{-i}\| \right] \lesssim \frac{\eta}{n} \sum_{t=0}^{T-1} \mathbb{E}_{\mathcal{D}_k} \left[ \widehat{F}_k(w_k^{(t)}) \right].$$

Let us define  $c_{k,K} := \max_{i \in [n]} \sum_{j=k+1}^K \sum_{t=0}^{T-1} \max_{w_{\alpha t} \in [w_j^{(t)}, w_j^{(t), -i}]} \widehat{F}_j(w_{\alpha t})$ . Then by this lemma we have,

$$\mathbb{E}_{\mathcal{D}_k} \left[ \frac{1}{n} \sum_{i=1}^n \|w_K - w_K^{-i}\| \right] \leq \frac{\eta e^{\frac{\eta}{\sqrt{m}} c_{k,K}}}{n} \sum_{t=0}^{T-1} \mathbb{E}_{\mathcal{D}_k} \left[ \widehat{F}_k(w_k^{(t)}) \right].$$

### B.1.1 BOUNDING $c_{k,K}$

In order to bound  $c_{k,K}$ , we use the following result on the quasi-convexity properties of the two-layer neural net objective by (Taheri & Thrampoulidis, 2024, Prop. 5.1).

**Lemma 2.** *Suppose  $\widehat{F} : \mathbb{R}^{d'} \rightarrow \mathbb{R}$  satisfies the self-bounded weak convexity property with parameter  $\kappa$ . Let  $w_1, w_2 \in \mathbb{R}^{d'}$  be two arbitrary points with distance  $\|w_1 - w_2\| \leq D < \sqrt{2/\kappa}$ . Set  $\tau := (1 - \kappa D^2/2)^{-1}$ . Then,*

$$\max_{v \in [w_1, w_2]} \widehat{F}(v) \leq \tau \cdot \max \left\{ \widehat{F}(w_1), \widehat{F}(w_2) \right\}.$$

For self-bounded losses  $\kappa = \frac{1}{\sqrt{m}}$ , therefore if  $w, w'$  are such that  $\|w - w'\| \leq D \leq m^{1/4}$ , then

$$\max_{v \in [w, w']} \widehat{F}(v) \leq \frac{1}{1 - \frac{D^2}{\sqrt{m}}} \cdot \max \left\{ \widehat{F}(w), \widehat{F}(w') \right\}.$$

Recall,

$$\|w_K - w_K^{-i}\| \leq \exp \left( \frac{\eta}{\sqrt{m}} \sum_{j=k+1}^K \sum_{t=0}^{T-1} \max_{w_{\alpha t} \in [w_j^{(t)}, w_j^{(t), -i}]} \widehat{F}_j(w_{\alpha t}) \right) \|w_k - w_k^{-i}\|.$$

Assume

$$\sqrt{m} \geq 8 \max \left\{ \eta \sum_{j=k+1}^K \sum_{t=0}^{T-1} (\widehat{F}_j(w_j^{(t)}) + \widehat{F}_j(w_j^{(t), -i})), \|w_k - w_k^{-i}\|^2 \right\}. \quad (10)$$

Then, by induction  $\|w_j^{(t)} - w_j^{(t), -i}\| \leq 2\|w_k - w_k^{-i}\|$  for all  $t \in [T], j \in [k, K]$ . To see this:

$$\begin{aligned} & \|w_j^{(t)} - w_j^{(t), -i}\| \\ & \leq \exp \left( \frac{\eta}{\sqrt{m}} \sum_{j'=k+1}^{j-1} \sum_{\tau=0}^{T-1} \max_{w_{\alpha\tau} \in [w_{j'}^{(\tau)}, w_{j'}^{(\tau), -i}]} \widehat{F}_{j'}(w_{\alpha\tau}) + \sum_{\tau=0}^{t-1} \max_{w_{\alpha\tau} \in [w_j^{(\tau)}, w_j^{(\tau), -i}]} \widehat{F}_j(w_{\alpha\tau}) \right) \\ & \quad \times \|w_k - w_k^{-i}\| \end{aligned}$$

By induction's assumption  $\sqrt{m} \geq 2\|w_{j'}^{(\tau)} - w_{j'}^{(\tau), -i}\|^2$ . Therefore we can invoke Lemma 2 for all the  $\max \widehat{F}_{j'}$ , to find that,

$$\|w_j^{(t)} - w_j^{(t), -i}\| \leq \exp(1/4) \cdot \|w_k - w_k^{-i}\| \leq 2\|w_k - w_k^{-i}\|.$$

Which proves the induction. Overall, we could bound  $c_{K,k}$  based on the training objective. assuming  $\widehat{F}_j(w_j^{(t)})$  and  $\widehat{F}_j(w_j^{(t), -i})$  are of the same order(needs proof), then we find

$$c_{K,k} \leq 2 \sum_{j=k+1}^K \sum_{t=0}^{T-1} (\widehat{F}_j(w_j^{(t)}) + \widehat{F}_j(w_j^{(t), -i})) = O \left( \sum_{j=k+1}^K \sum_{t=0}^{T-1} \widehat{F}_j(w_j^{(t)}) \right)$$

To simplify the statement of the lemma, we can assume  $\widehat{F}_j(w_j^{(t)})$  and  $\widehat{F}_j(w_j^{(t), -i})$  are of the same order as reducing the sample-size by 1 sample does not affect the training bounds.

**Lemma 3.** *Let the assumptions of Lemma 1 hold. Assume*

$$\sqrt{m} \gtrsim \eta \sum_{j=k+1}^K \sum_{t=0}^{T-1} (\widehat{F}_j(w_j^{(t)}) + \widehat{F}_j(w_j^{(t),\neg i})) \asymp \eta \sum_{j=k+1}^K \sum_{t=0}^{T-1} \widehat{F}_j(w_j^{(t)}).$$

Then,

$$\mathbb{E}_{\mathcal{D}_k} \left[ \frac{1}{n} \sum_{i=1}^n \|w_K - w_K^{\neg i}\| \right] \leq \frac{\eta}{n} \mathbb{E}_{\mathcal{D}_k} \left[ e^{\frac{\eta}{\sqrt{m}} c_{k,K}} \sum_{t=0}^{T-1} \widehat{F}_k(w_k^{(t)}) \right]$$

where  $c_{k,K} = O\left(\sum_{j=k+1}^K \sum_{t=0}^{T-1} \widehat{F}_j(w_j^{(t)})\right)$ .

*Proof.* The proof essentially follows by the last two lemmas and noting that  $\|w_k - w_k^{\neg i}\| \leq \|w_k - w_{k-1}\| + \|w_k^{\neg i} - w_{k-1}\| = O(\|w_k^* - w_{k-1}\|)$  by Lemma 1. Therefore the condition we had in Eq. 10 on  $\sqrt{m} \geq \|w_k - w_k^{\neg i}\|^2$  is absorbed in the condition from Lemma 1.  $\square$

This completes the proof of Theorem 4.

## B.2 PROOF OF THEOREM 3

**Theorem 6** (Restatement of Theorem 3). *Assume the loss function is 1-Lipschitz and 1-smooth. Then, the expected delayed generalization gap satisfies,*

$$\mathcal{F}_{k,K}^{\text{gen}} := \mathbb{E}_{\mathcal{D}_k} \left[ F_k(w_K) - \widehat{F}_k(w_K) \right] \lesssim \frac{\eta T e^{\frac{\eta T (K-k+1)}{\sqrt{m}}}}{n}.$$

*Proof.* The proof of Theorem 3 essentially follows from Theorem 4. We outline the distinct steps. Note that since the objective is 1-Lipschitz, it holds  $\widehat{F}'(w) \leq 1$  for any  $w$ . Therefore Eq. 8 from the proof of Theorem 3 changes into

$$\|w_K - w_K^{\neg i}\| \leq \left(1 + \frac{\eta L R^2}{\sqrt{m}}\right) \|w_K^{(T-1)} - w_K^{(T-1),\neg i}\|.$$

As a result, by unrolling the iterates and noting that  $R \leq 1$ :

$$\|w_K - w_K^{\neg i}\| \leq \exp\left(\frac{\eta L (K-k) T}{\sqrt{m}}\right) \|w_k - w_k^{\neg i}\|. \quad (11)$$

Moreover, again using the Lipschitz loss function properties:

$$\begin{aligned} \|w_k - w_k^{\neg i}\| &\leq \left\| w_k^{(T-1)} - \eta \nabla \widehat{F}_k(w_k^{(T-1)}) - (w_k^{(T-1),\neg i} - \eta \nabla \widehat{F}_k(w_k^{(T-1),\neg i})) \right\| \\ &\quad + \eta \left\| \nabla \widehat{F}_k^i(w_k^{(T-1),\neg i}) \right\| \\ &\leq \left\| w_k^{(T-1)} - \eta \nabla \widehat{F}_k(w_k^{(T-1)}) - (w_k^{(T-1),\neg i} - \eta \nabla \widehat{F}_k(w_k^{(T-1),\neg i})) \right\| + \frac{\eta L}{n} \\ &\leq \exp\left(\frac{\eta L}{\sqrt{m}}\right) \|w_k^{(T-1)} - w_k^{(T-1),\neg i}\| + \frac{\eta L}{n} \\ &\leq \exp\left(\frac{2\eta L}{\sqrt{m}}\right) \|w_k^{(T-2)} - w_k^{(T-2),\neg i}\| + (1 + \exp\left(\frac{\eta L}{\sqrt{m}}\right)) \frac{\eta L}{n} \\ &\leq \left(\sum_{t=0}^{T-1} \exp\left(\frac{\eta L t}{\sqrt{m}}\right)\right) \frac{\eta L}{n} \\ &\leq \exp\left(\frac{\eta L T}{\sqrt{m}}\right) \frac{\eta L T}{n}. \end{aligned}$$

where the last step is derived by repeating the procedure over all  $T$  iterations.

Inserting this in Eq. 11, taking the expectation over  $\mathcal{D}_k$ , using Eq. 7 and noting that  $L$  (the objective's Lipschitz parameter) is constant for our setup, conclude the proof of the theorem.  $\square$

## C BOUNDING TRAIN-TIME LOSS AND FORGETTING FOR XOR CLUSTER DATA

In this section, we prove Theorems 1-2. Below, is a restatement of these theorems.

**Theorem 7** (Restatement of Theorems 1-2). *Consider the  $d$ -dimensional XOR cluster dataset with  $K$  tasks and assume gradient descent with  $\eta T = \Theta(d^2)$  iterations and  $n = \tilde{\Theta}(d^2 K)$  samples for each subsequent task trained by a neural net with  $m = \tilde{\Omega}(d^8 K^4)$  hidden neurons. Then, with high probability, the train-time forgetting and per-task train-time error is  $\mathcal{F}_{k,K}^{\text{tr}} = o_d(1)$ . In particular, for the train-time forgetting with probability  $1 - \delta$ , we have:*

$$|\mathcal{F}_{k,K}^{\text{tr}}| := |\hat{F}_k(w_K) - \hat{F}_k(w_k)| = \tilde{O}\left(\eta T \frac{\sqrt{K-k}}{d\sqrt{n}} + \eta T \frac{\sqrt{K-k}}{d^2 \text{poly log}(d)} + \eta^2 T^2 \frac{K^2}{\sqrt{m}}\right),$$

where  $\tilde{O}(\cdot)$  hides logarithmic factors in  $n$  and  $\delta$ .

The proof strategy is as follows. First, we consider the  $m \rightarrow \infty$  and derive the weights for arbitrary number of GD steps for each task. We then show that for sufficiently large  $T$  and sufficiently large  $n$ , and by computing the network output via concentration bounds based on  $n$  for the considered XOR cluster dataset, the train-loss and forgetting are approximately zero. We then compute the error due to finite-width, showing that under sufficiently small  $T$ , and sufficiently large  $m$ , the derivations of the infinite-width regime are approximately correct. This leads to the desired quantities and train-time forgetting bounds based  $n, T$  and  $m$  as stated in the theorem. We start by considering the infinite width regime.

### C.1 TRAINING ERROR FOR AN INFINITELY WIDE NETWORK

First, we consider the  $m \rightarrow \infty$  regime and characterize the distribution of the final weights after  $T$  and  $2T$  iterations in this regime. We then discuss the general formula for arbitrary number of tasks. Recall, we considered the hinge-loss for training-time analysis. However, as mentioned in the main body of the paper and as it will become clear in the following analysis, we can simplify the arguments by noting that throughout the optimization process for all  $K$  tasks, only the linear part of the loss is used. Thus we can assume the loss function as  $f(u) = 1 - u$  without loss of generality.

Let us simplify the notation by dropping the task index from weights and instead denoting the vector entering the  $i$ th neuron by  $w^i \in \mathbb{R}^d$ . Note that by Taylor expansion around the Gaussian initialization  $w_0$ , we have,

$$\Phi(w, x) = \Phi(w_0, x) + \frac{1}{\sqrt{m}} \sum_{i=1}^m a_i \phi'(\langle w_0^i, x \rangle) \langle x, w^i - w_0^i \rangle + O\left(\frac{\|w - w_0\|}{\sqrt{m}}\right).$$

For  $w$  close to  $w_0$ , and for large enough  $m$  we can use a linearized neural network model. In particular, in the  $m \rightarrow \infty$  regime, the updates of the continual learning algorithm are the following for sufficiently small  $T$ :

$$w_1^i = w_0^i + \eta \frac{1}{\sqrt{m}} \frac{1}{n} \sum_{j=1}^n a_i \phi'(\langle w_0^i, x_j^1 \rangle) x_j^1 y_j^1$$

$$w_T^i = w_0^i + \frac{\eta T}{\sqrt{m}} \frac{1}{n} \sum_{j=1}^n a_i \phi'(\langle w_0^i, x_j^1 \rangle) x_j^1 y_j^1$$

$$w_{2T}^i = w_0^i + \frac{\eta T}{\sqrt{m}} \frac{1}{n} \sum_{j=1}^n a_i \phi'(\langle w_0^i, x_j^1 \rangle) x_j^1 y_j^1 + \frac{\eta T}{\sqrt{m}} \frac{1}{n} \sum_{j=1}^n a_i \phi'(\langle w_0^i, x_j^2 \rangle) x_j^2 y_j^2$$

We consider  $x_j^k, y_j^k$  for any  $j \in [n]$  and  $k \in [K]$  as fixed training points used for training task  $k$ . We consider randomness only with respect to the initialization  $w_0^i$  and characterize the distribution of weights in the infinite width regime. As  $m \rightarrow \infty$  given the IID initialization for  $w_0^i$  and the quadratic activation, we deduce the following convergence in distribution,

$$w_T^i = w_0^i + \frac{\eta T}{\sqrt{m}} \frac{1}{n} \sum_{j=1}^n a_i \phi'(\langle w_0^i, x_j \rangle) x_j^1 y_j^1 \rightarrow \omega z + \frac{\eta t}{\sqrt{m}} \frac{1}{n} \sum_{j=1}^n z^\top x_j^1 x_j^1 y_j^1 \quad (12)$$

where  $\omega \in \{\pm 1\}, z \in \mathbb{R}^d$  are Rademacher random variable and standard Gaussian random vector, respectively, and they represent first layer and second layer initialization.

Let us briefly consider the matrix formulation,

$$R = \frac{1}{n} \sum_{j=1}^n y_j^1 x_j^1 z^\top x_j^1 =: Az$$

then  $R \sim \mathcal{N}(0, A^2)$  as  $Cov(R) = \mathbb{E}[Az z^\top A^\top] = A \mathbb{E}[z z^\top] A^\top = A A^\top = A^2$ . In the infinite  $n$  asymptotic,  $A \rightarrow \mathbb{E}[y_j x_j x_j^\top] = \frac{1}{2} \mathbb{E}[x x^\top | y = 1] - \frac{1}{2} \mathbb{E}[x x^\top | y = -1] = \frac{1}{2} (\mu_+^1 \mu_+^{1^\top} - \mu_-^1 \mu_-^{1^\top})$ , indicating that the GD updates learn the true vectors in the  $n \rightarrow \infty$  regime.

A similar argument leads to the following update rule for the second task:

$$w_{2T}^i \sim z + \frac{\eta T}{\sqrt{m}} A_1 \omega z + \frac{\eta T}{\sqrt{m}} A_2 \omega z, \quad A_1 := \frac{1}{n} \sum_{j=1}^n y_j^1 x_j^1 x_j^{1^\top}, \quad A_2 := \frac{1}{n} \sum_{j=1}^n y_j^2 x_j^2 x_j^{2^\top}$$

where again  $z \sim \mathcal{N}(0, I_d)$  and  $\omega$  is a Rademacher r.v. for representing the binary second layer weights  $a_i$ .

Similarly, we find that after  $K$  tasks with  $T$  iterations for each task, the weight  $w_{KT}^i$  takes the following form:

$$w_{KT}^i \sim z + \frac{\eta T}{\sqrt{m}} \sum_{j=1}^K A_j \omega z, \quad A_j := \frac{1}{n} \sum_{v=1}^n y_v^j x_v^j x_v^{j^\top}$$

Recalling the expression for the neural network output, we can characterize the output of the network with this random variable in the infinitely wide regime:

$$\begin{aligned} \Phi(w_{KT}, x) &= \frac{1}{\sqrt{m}} \sum_{i=1}^m a_i (\langle w_{KT}^i, x \rangle)^2 \sim \frac{1}{\sqrt{m}} \sum_{i=1}^m \omega_i \left( \left\langle z_i + \frac{\eta T}{\sqrt{m}} \sum_{j=1}^K A_j \omega_i z_i, x \right\rangle \right)^2 \\ &= \frac{\eta T}{m} \sum_{i=1}^m \langle z_i, x \rangle \left\langle \left( \sum_{j=1}^K A_j \right) z_i, x \right\rangle + \frac{1}{\sqrt{m}} \sum_{i=1}^m \omega_i (z_i^\top x)^2 \\ &\quad + \frac{\eta^2 T^2}{m \sqrt{m}} \sum_{i=1}^m \omega_i \left( \left\langle z_i + \frac{\eta T}{\sqrt{m}} \sum_{j=1}^K A_j \omega_i z_i, x \right\rangle \right)^2 \end{aligned}$$

when  $m \rightarrow \infty$ :

$$\begin{aligned} &\rightarrow \eta T \mathbb{E}_z \left[ \langle z, x \rangle \left\langle \left( \sum_{j=1}^K A_j \right) z, x \right\rangle \right] + N + 0 \\ &= \eta T x^\top \left( \sum_{j=1}^K A_j \right) x + N \end{aligned} \quad (13)$$

where the last step is by the law of large number and  $N$  denotes the asymptotic distribution of the second term. The last term vanishes by the law of large numbers. We derive the training loss by calculating the above for  $x$  coming from the training distribution.

We discuss the role of each term in Eq. 13. First, considering the first term above, the training loss for task  $K$  w.r.t the first training sample is the following,

$$\frac{\eta^T}{n} x_1^{\top} K^{\top} \sum_{k=1}^K \sum_{i=1}^n y_i^k x_i^k x_i^{k\top} x_1^K \quad (14)$$

We split the summation into the relevant task  $k = K$  and other tasks when  $k \neq K$ .

**Case I:**  $k = K$ . Let us drop  $K$  in Eq. 14. we have

$$\frac{1}{n} x_1^{\top} \sum_{i=1}^n y_i x_i x_i^{\top} x_1 = \frac{1}{n} \sum_{i=1}^n y_i (x_i^{\top} x_1)^2 = \frac{1}{n} (y_1 \|x_1\|^4 + \sum_{i=2}^n y_i (x_i^{\top} x_1)^2).$$

Recall our data model:

$$x \sim \mathcal{N}(\pm \mu_{\pm}^K, \sigma^2 I_d) \quad \text{if } y = +1, \quad x \sim \mathcal{N}(\pm \mu_{\pm}^K, \sigma^2 I_d) \quad \text{if } y = -1,$$

with the following assumptions:

$$\mu_{+}^K \perp \mu_{-}^K, \quad \|\mu_{+}^K\| = \|\mu_{-}^K\| = \frac{1}{\sqrt{d}}, \quad \sigma = O\left(\frac{1}{\sqrt{d} \text{poly log}(d)}\right).$$

Let

$$U := \frac{1}{n} \sum_{i=1}^n y_i (x_i^{\top} x_1)^2.$$

Fix  $x_1, y_1$ . For any  $i \neq 1$ , we write

$$x_1 = \mu_{y_1}^K + \varepsilon_1, \quad x_i = \mu_{y_i}^K + \varepsilon_i,$$

with  $\varepsilon_1, \varepsilon_i \sim \mathcal{N}(0, \sigma^2 I_d)$ , independent. Then:

$$x_i^{\top} x_1 = \mu_{y_i}^{K\top} \mu_{y_1}^K + \mu_{y_i}^{K\top} \varepsilon_1 + \mu_{y_1}^{K\top} \varepsilon_i + \varepsilon_i^{\top} \varepsilon_1.$$

Note that  $(\mu_{y_i}^{K\top} \mu_{y_1}^K)^2 = \frac{1}{d^2}$  if  $y_i = y_1$  and 0 otherwise.

Hence,

$$\mathbb{E}[y_i (x_i^{\top} x_1)^2 | y_i] = \begin{cases} \mathbb{E}[y_1 (\pm \frac{1}{d} \pm \mu_{y_1}^{K\top} \varepsilon_1 + \mu_{y_1}^{K\top} \varepsilon_i + \varepsilon_i^{\top} \varepsilon_1)^2] & \text{if } y_i = y_1, \\ \mathbb{E}[-y_1 (\pm \mu_{-y_1}^{K\top} \varepsilon_1 + \mu_{y_1}^{K\top} \varepsilon_i + \varepsilon_i^{\top} \varepsilon_1)^2] & \text{if } y_i \neq y_1. \end{cases}$$

Assuming a balanced distribution, i.e.,  $\Pr[y_i = y_1] = \Pr[y_i \neq y_1] = \frac{1}{2}$ , we get:

$$\mathbb{E}[y_i (x_i^{\top} x_1)^2] = \frac{y_1}{2d^2} + O\left(\frac{1}{d^2 \cdot \text{poly log}(d)}\right)$$

where in the above, we used  $\mu_{y_1}^{K\top} \varepsilon_1 = O(\frac{1}{d \cdot \text{poly log}(d)})$  w.h.p. over the randomness in  $\varepsilon_1$ .

Thus, the overall expectation is the following:

$$\mathbb{E}[U] = \frac{y_1}{2d^2} + O\left(\frac{1}{d^2 \cdot \text{poly log}(d)}\right)$$

which aligns with the true label  $y_1$ .

To compute the finite sample guarantees, note that each summand

$$Z_i = y_i (x_i^\top x_1)^2$$

is sub-exponential with scale parameter  $O(1/d)$  as  $(\epsilon_i^\top \epsilon_1)^2$  has standard deviation  $\frac{1}{d \text{poly log}(d)}$  uniformly for all  $i > 1$ . By Bernstein's inequality, for any  $\delta \in (0, 1)$ , with probability at least  $1 - \delta$  over the randomness in  $\{x_i, y_i\}_{i \in [n]}$ ,

$$|U - \mathbb{E}[U]| \leq C \left( \frac{1/d}{\sqrt{n}} \sqrt{\log(1/\delta)} + \frac{1/d}{n} \log(1/\delta) \right) = O \left( \frac{1}{d\sqrt{n}} \sqrt{\log(1/\delta)} \right),$$

for some absolute constant  $C > 0$ .

Putting together, with probability at least  $1 - \delta$

$$U = \frac{1}{n} \sum_{i=1}^n y_i (x_i^\top x_1)^2 = \frac{y_1}{2d^2} \pm O \left( \frac{1}{d^2 \cdot \text{poly log}(d)} + \frac{1}{d\sqrt{n}} \sqrt{\log(1/\delta)} \right).$$

In particular, if  $n \gg d^2 \log(1/\delta)$ , then the error term is much smaller than the signal  $\frac{1}{2d^2}$ , and therefore  $\text{sign}(T) = y_1$ . with a union bound over all training points which introduces an additional factor  $\log(n)$  in the above bound, we find that the train error is exactly zero.

**Case II:**  $k \neq K$ . Now we evaluate the other terms in the summation in Eq. 14

$$x^\top A_j x = \frac{1}{n} \sum_{i=1}^n y_i^j (x^\top x_i^j)^2$$

for some  $j \neq K$ . drop 1 and note that

$$x_i \sim \mathcal{N}(\pm \mu_+^j, \sigma^2 I_d) \quad \text{if } y_i = +1, \quad x_i \sim \mathcal{N}(\pm \mu_-^j, \sigma^2 I_d) \quad \text{if } y_i = -1,$$

$$x \sim \mathcal{N}(\pm \mu_+^K, \sigma^2 I_d) \quad \text{if } y = +1, \quad x \sim \mathcal{N}(\pm \mu_-^K, \sigma^2 I_d) \quad \text{if } y = -1,$$

where  $\mu_+^j, \mu_-^j, \mu_+^K, \mu_-^K$  are mutually orthogonal,  $\|\mu_+^j\| = \|\mu_-^j\| = \|\mu_+^K\| = \|\mu_-^K\| = \frac{1}{\sqrt{d}}$ , and  $\sigma = O \left( \frac{1}{\sqrt{d} \text{poly log}(d)} \right)$ .

Let

$$U' = \frac{1}{n} \sum_{i=1}^n y_i (x_i^\top x)^2.$$

let  $x = \mu + \epsilon$ , we have

$$\mathbb{E} [y_i (x_i^\top x)^2 | y_i] = \begin{cases} \mathbb{E}[(\pm \mu_{y_i}^K \epsilon + \mu^\top \epsilon + \epsilon_i^\top \epsilon)^2] & \text{if } y_i = 1, \\ \mathbb{E}[-(\pm \mu_{-y_i}^K \epsilon + \mu^\top \epsilon + \epsilon_i^\top \epsilon)^2] & \text{if } y_i = -1. \end{cases}$$

Hence,

$$\mathbb{E}[U'] = O \left( \frac{1}{d^2 \text{poly log}(d)} \right).$$

Define

$$Z_i = y_i (x_i^\top x)^2.$$

By expanding  $x_i = \mu_{y_i}^j + \epsilon_i$ ,  $x = \mu_y^K + \epsilon'$ , and using  $\sigma = O(1/\sqrt{d})$ , one can verify that

$$\text{Var}(x_i^\top x) = O \left( \frac{1}{d} \right),$$

and that  $(x_i^\top x)^2$  is sub-exponential with scale parameter  $O(1/d)$ . Thus each  $Z_i$  is sub-exponential with parameter  $O(1/d)$ .

By Bernstein's inequality for i.i.d. sub-exponential random variables, for any  $\delta \in (0, 1)$ , with probability at least  $1 - \delta$ ,

$$|U'| = \left| \frac{1}{n} \sum_{i=1}^n (Z_i - \mathbb{E}[Z_i]) \right| \leq C \left( \frac{1/d}{\sqrt{n}} \sqrt{\log(1/\delta)} + \frac{1/d}{n} \log(1/\delta) \right) = O \left( \frac{1}{d\sqrt{n}} \sqrt{\log(1/\delta)} \right),$$

for some absolute constant  $C$ .

1188 **Combining the two cases.** Together with the two results above we find for any training data point  
 1189  $(x, y)$  from task  $K$ :

$$1190 \quad x^\top \left( \sum_{j=1}^K A_j \right) x = \frac{y}{2d^2} \pm O \left( \frac{\sqrt{K}}{d^2 \text{poly log}(d)} + \frac{\sqrt{K}}{d\sqrt{n}} \sqrt{\log(1/\delta)} \right)$$

1194 This concludes the calculations of the first term in Eq. 13.

1195 Now let us consider the noise term (denoted by  $N$ ) in Eq. 13:

$$1196 \quad N = \frac{1}{\sqrt{m}} \sum_{i=1}^m \omega_i (z_i^\top x)^2.$$

1201 note that  $\omega_i (z_i^\top x)^2$  has variance  $O(\frac{1}{\text{poly log}(d)})$ , therefore by CLT

$$1202 \quad \frac{1}{\sqrt{m}} \sum_{i=1}^m \omega_i (z_i^\top x)^2 \rightarrow \mathcal{N}(0, \frac{1}{\text{poly log}(d)}).$$

1205 Overall, in the infinite width limit, for some  $x, y$  from the  $K$ 'th task's empirical distribution

$$1207 \quad \begin{aligned} \Phi(w_{KT}, x) &= \eta T x^\top \left( \sum_{j=1}^K A_j \right) x + \mathcal{N}(0, 1) \\ 1208 &= \eta T \left( \frac{y_k}{d^2} \pm O \left( \frac{\sqrt{K}}{d^2 \text{poly log}(d)} + \frac{\sqrt{K}}{d\sqrt{n}} \sqrt{\log(1/\delta)} \right) \right) + O \left( \frac{\sqrt{\log(1/\delta)}}{\text{poly log}(d)} \right). \end{aligned}$$

1213 In particular, if  $n = \Omega(d^2 K \log(1/\delta))$ , then the error term is smaller than the signal  $\frac{y_k}{d^2}$ , and if  
 1214  $\eta T = \Theta(d^2)$  then the output aligns with  $y$ . With a union bound over all training points (which  
 1215 introduces an additional factor  $\log(n)$  in the above bound), we find that the train error (%) is exactly  
 1216 zero for all  $k \in [n]$ , leading to the zero train error.

## 1218 C.2 CHARACTERIZING FORGETTING FOR INFINITELY WIDE NETS

1219 We can directly compute  $\widehat{F}_k(w_{KT})$  by computing  $\Phi(w_{KT}, x_1^k)$  where  $x_1^k$  is a sample (first sample  
 1220 w.l.o.g) from the training data for task  $k$  where  $k < K$ . Recall,

$$1221 \quad w_{KT}^i \sim z + \frac{\eta T}{\sqrt{m}} \sum_{j=1}^K A_j \omega_j z, \quad A_j := \frac{1}{n} \sum_{v=1}^n y_v^j x_v^j x_v^{j\top}$$

1225 note that the above is symmetric with respect to the task index therefore  $\lim_{m \rightarrow \infty} \Phi(w_{KT}, x_1^k) =$   
 1226  $\lim_{m \rightarrow \infty} \Phi(w_{KT}, x_1^K)$  in distribution. and we have in the  $m \rightarrow \infty$  limit for  $x_k := x_1^k$ :

$$1227 \quad \begin{aligned} \Phi(w_{KT}, x_k) &= \eta T x_k^\top \left( \sum_j A_j \right) x_k + \mathcal{N}(0, \frac{1}{\text{poly log}(d)}) \quad (15) \\ 1228 &= \eta T \left( \frac{y_k}{d^2} \pm O \left( \frac{\sqrt{K}}{d^2 \text{poly log}(d)} + \frac{\sqrt{K}}{d\sqrt{n}} \sqrt{\log(1/\delta)} \right) \right) + O \left( \frac{\sqrt{\log(1/\delta)}}{\text{poly log}(d)} \right). \end{aligned}$$

1232 Therefore, again if  $n = \Omega(d^2 K \log(1/\delta))$ , then the error term is smaller than the signal  $\frac{y_k}{d^2}$ , and if  
 1233  $\eta T = \Theta(d^2)$  then the output aligns with  $y_k$ . With a union bound over all training points  $k \in [n]$ , we  
 1234 find that the training error is exactly zero for all tasks.

1235 Now to characterize forgetting, recall it is defined as

$$1236 \quad \begin{aligned} |\widehat{F}_k(w_K) - \widehat{F}_k(w_k)| &= \left| \sum_{x_k} \eta T x_k^\top \left( \sum_{j=k+1}^K A_j \right) x_k \right| \quad (16) \\ 1237 &= \eta T \cdot O \left( \frac{\sqrt{K-k}}{d^2 \text{poly log}(d)} + \frac{\sqrt{K-k}}{d\sqrt{n}} \sqrt{\log(1/\delta)} \right). \end{aligned}$$

where the calculations are the same as before except that the impact of initialization noise is present in both  $\widehat{F}_k(w_K)$ ,  $\widehat{F}_k(w_k)$  and thus it is canceled.

In the above expression, if  $n = \widetilde{\Omega}(d^2(K - k))$  and  $\eta T \asymp d^2$ , the increase in forgetting is  $o_d(1)$ .

### C.3 FINITE-WIDTH ERROR

The calculations above hold for the infinitely-wide network. In this section, we derive the error due to finite width. Recall,

$$\Phi(w, x) = \Phi(w_0, x) + \frac{1}{\sqrt{m}} \sum_{i=1}^m a_i \phi'(\langle w_0^i, x \rangle) \langle x, w^i - w_0^i \rangle + O\left(\frac{\|w - w_0\|^2}{\sqrt{m}}\right)$$

for the infinite width limit we had,

$$\begin{aligned} \bar{w}_1^i &= w_0^i + \eta \frac{1}{\sqrt{m}} \frac{1}{n} \sum_{j=1}^n a_i \phi'(\langle w_0^i, x_j^1 \rangle) x_j^1 y_j^1 \\ \bar{w}_t^i &= w_0^i + \frac{\eta t}{\sqrt{m}} \frac{1}{n} \sum_{j=1}^n a_i \phi'(\langle w_0^i, x_j^1 \rangle) x_j^1 y_j^1 \\ \bar{w}_{2t}^i &= w_0^i + \frac{\eta t}{\sqrt{m}} \frac{1}{n} \sum_{j=1}^n a_i \phi'(\langle w_0^i, x_j^1 \rangle) x_j^1 y_j^1 + \frac{\eta t}{\sqrt{m}} \frac{1}{n} \sum_{j=1}^n a_i \phi'(\langle w_0^i, x_j^2 \rangle) x_j^2 y_j^2, \end{aligned}$$

and similarly, all tasks' updates were derived. Let  $\Phi(\cdot, \cdot)$  be the infinite-width and  $\Phi_m(\cdot, \cdot)$  be the finite-width formulations of the network output. Then, we are interested in bounding  $|\Phi(\bar{w}_t, x) - \Phi_m(w_t, x)|$  which can be written as:

$$\begin{aligned} |\Phi(\bar{w}_t, x) - \Phi_m(w_t, x)| &\leq |\Phi(z, x) - \Phi_m(w_0, x)| \\ &\quad + \left| \frac{1}{\sqrt{m}} \sum_{i=1}^m a_i \langle w_0^i, x \rangle \langle x, w_t^i - w_0^i \rangle - \eta t \mathbb{E}_z[\langle z, x \rangle \langle x, A_1 z \rangle] \right| \\ &\quad + O\left(\frac{\|w_t - w_0\|^2}{\sqrt{m}}\right) \\ &\leq O\left(\frac{1}{\sqrt{m}} + \frac{\|w_t - w_0\|^2}{\sqrt{m}}\right) \\ &\quad + \left| \frac{1}{\sqrt{m}} \sum_{i=1}^m a_i \langle w_0^i, x \rangle \langle x, w_t^i - w_0^i \rangle - \eta t \mathbb{E}_z[\langle z, x \rangle \langle x, A_1 z \rangle] \right| \end{aligned}$$

where we used the fact that by LLN:  $\frac{1}{\sqrt{m}} \sum_{i=1}^m a_i \langle w_0^i, x \rangle \langle x, w_t^i - w_0^i \rangle \rightarrow \eta t \mathbb{E}_z[\langle z, x \rangle \langle x, A_1 z \rangle]$ .

Note that  $w_t^i - w_0^i = \frac{\eta}{\sqrt{mn}} \sum_{\tau=0}^{t-1} \sum_{j=1}^n a_i \langle w_\tau^i, x_j \rangle x_j y_j$ , therefore when  $m \rightarrow \infty$ :

$$\begin{aligned} \frac{1}{\sqrt{m}} \sum_{i=1}^m a_i \langle w_0^i, x \rangle \langle x, w_t^i - w_0^i \rangle &= \frac{\eta}{n} \sum_{\tau=0}^{t-1} \sum_{j=1}^n \langle x, x_j y_j \rangle \frac{1}{m} \sum_{i=1}^m \langle w_0^i, x \rangle \langle w_\tau^i, x_j \rangle \\ &\rightarrow \frac{\eta}{n} \sum_{\tau=0}^{t-1} \sum_{j=1}^n \langle x, x_j y_j \rangle \mathbb{E}[\langle w_0^i, x \rangle \langle w_\tau^i, x_j \rangle] \end{aligned}$$

$\langle w_0^i, x \rangle$  is Gaussian with variance  $\|x\|^2$  and  $\langle w_\tau^i, x_j \rangle$  is bounded by  $D_\tau^i \|x_j\|$  where  $D_\tau^i := \|w_\tau^i - w_0^i\|$ , therefore  $\langle w_0^i, x \rangle \langle w_\tau^i, x_j \rangle$  is bounded by  $\|x\| \|x_j\| D_\tau^i = O(D_\tau^i)$ . and by Hoeffding's concentration inequality:

$$\left| \frac{1}{m} \sum_{i=1}^m \langle w_0^i, x \rangle \langle w_\tau^i, x_j \rangle - \mathbb{E}[\langle w_0^i, x \rangle \langle w_\tau^i, x_j \rangle] \right| = O\left(\frac{D_\tau^i}{\sqrt{m}}\right)$$

and hence w.h.p,

$$\begin{aligned} & \left| \frac{\eta}{n} \sum_{\tau=0}^{t-1} \sum_{j=1}^n \langle x, x_j y_j \rangle \frac{1}{m} \sum_{i=1}^m \langle w_0^i, x \rangle \langle w_\tau^i, x_j \rangle - \frac{\eta}{n} \sum_{\tau=0}^{t-1} \sum_{j=1}^n \langle x, x_j y_j \rangle \mathbb{E}[\langle w_0^i, x \rangle \langle w_\tau^i, x_j \rangle] \right| \\ &= O\left(\frac{\eta}{\sqrt{m}} \sum_{\tau} \max_i D_\tau^i\right) \\ &= \tilde{O}\left(\frac{\eta}{\sqrt{m}} \sum_{\tau} D_\tau^1\right) = \tilde{O}\left(\frac{\eta t D_t^1}{\sqrt{m}}\right) \end{aligned}$$

where we used again  $x^\top x_j \lesssim 1$ , the fact that due to symmetry we expect  $D_\tau^i$  to be of the same order for different  $i$ s and also  $D_\tau^i < D_t^i$  for all  $\tau \leq t$ . Putting these back to the inequality in the last page for the finite-width error of the network's output:

$$|\Phi(\bar{w}_t, x) - \Phi_m(w_t, x)| = \tilde{O}\left(\frac{1}{\sqrt{m}} + \frac{\|w_t - w_0\|^2}{\sqrt{m}} + \frac{\eta t \|w_t^1 - w_0^1\|}{\sqrt{m}}\right).$$

similarly

$$|\Phi(\bar{w}_{KT}, x) - \Phi_m(w_{KT}, x)| = \tilde{O}\left(\frac{1}{\sqrt{m}} + \frac{\|w_{KT} - w_0\|^2}{\sqrt{m}} + \frac{\eta KT \|w_{KT}^1 - w_0^1\|}{\sqrt{m}}\right). \quad (17)$$

### C.3.1 BOUNDING THE WEIGHTS DISTANCE FROM INITIALIZATION

In order to complete the proof, we need to bound the distance from initialization i.e.,  $\|w_t - w_0\|$  and  $\|w_t^i - w_0^i\|$  for every  $i$  and  $t$ . We do this by an iterative argument as follows. Note that for the XOR cluster dataset  $\|x\| = \Theta_d(1)$ . Then, by recalling the updates of GD, we find that,

$$\begin{aligned} \|w_1^i - w_0^i\| &\leq \frac{\eta}{\sqrt{mn}} \sum_{i=1}^n |\langle w_0^i, x_j^1 \rangle| \|x_j^1\| \lesssim \frac{\eta}{\sqrt{m}} \\ \|w_2^i - w_0^i\| &\leq \frac{\eta}{\sqrt{mn}} \sum_{i=1}^n |\langle w_0^i, x_j^1 \rangle| \|x_j^1\| + \frac{\eta}{\sqrt{mn}} \sum_{i=1}^n |\langle w_1^i, x_j^1 \rangle| \|x_j^1\| \\ &\leq \frac{2\eta}{\sqrt{mn}} \sum_{i=1}^n |\langle w_0^i, x_j^1 \rangle| \|x_j^1\| + \frac{\eta}{\sqrt{mn}} \sum_{i=1}^n |\langle w_1^i - w_0^i, x_j^1 \rangle| \|x_j^1\| \\ &\lesssim \frac{2\eta}{\sqrt{m}} + \frac{\eta^2}{m} = O\left(\frac{2\eta}{\sqrt{m}}\right) \\ \|w_3^i - w_0^i\| &\leq \frac{3\eta}{\sqrt{mn}} \sum_{i=1}^n |\langle w_0^i, x_j^1 \rangle| \|x_j^1\| + \frac{\eta}{\sqrt{mn}} \sum_{i=1}^n |\langle w_1^i - w_0^i, x_j^1 \rangle| \|x_j^1\| \\ &\quad + \frac{\eta}{\sqrt{mn}} \sum_{i=1}^n |\langle w_2^i - w_0^i, x_j^1 \rangle| \|x_j^1\| \\ &\lesssim \frac{3\eta}{\sqrt{m}} + \left(\frac{\eta}{\sqrt{m}}\right)^2 + \left(\frac{\eta}{\sqrt{m}}\right)^3 = O\left(\frac{3\eta}{\sqrt{m}}\right) \end{aligned}$$

Therefore,  $\|w_t^i - w_0^i\| = O\left(\frac{t\eta}{\sqrt{m}}\right)$  when  $\eta = O_m(1)$ . We also have

$$\|w_t - w_0\| = O(t\eta).$$

By Eq. 17:

$$|\Phi(\bar{w}_{KT}, x) - \Phi_m(w_{KT}, x)| = \tilde{O}\left(\frac{1}{\sqrt{m}} + \frac{\eta^2 K^2 T^2}{\sqrt{m}} + \frac{\eta^2 K^2 T^2}{m}\right) = \tilde{O}\left(\frac{\eta^2 K^2 T^2}{\sqrt{m}}\right) \quad (18)$$

Recall that we had chosen  $\eta T = \Theta(d^2)$  to guarantee  $\text{sign}(\Phi(\bar{w}_{KT}, x_k)) = y_k$  and  $|\Phi(\bar{w}_{KT}, x_k)| \gtrsim 1$ , therefore if

$$m = \tilde{\Omega}(d^8 K^4),$$

the finite width error is small enough to conclude  $\text{sign}(\Phi_m(w_{KT}, x_K)) = y_K$  for any  $x_K, y_K$  from the  $K$ th task data distribution. Similarly, we have  $\text{sign}(\Phi_m(w_{KT}, x_k)) = y_k$  for any  $x_k, y_k$  from the  $k$ th task's data distribution because the error terms defined above are independent of the data distribution. Thus, the characterization of forgetting we derived in Eq. 15 is accurate for the same width.

Finally, we note that with the given assumptions on  $n, T, m, K$  it holds that  $\Phi_m(w_{KT}, x)$  is always bounded by 1. To see this, recall by Eq. 15 and Eq. 18, the network output for any training point  $x$  is at most hte following:

$$\begin{aligned} \Phi_m(w_{KT}, x) \leq \eta T \left( \frac{y_k}{d^2} \pm O \left( \frac{\sqrt{K}}{d^2 \text{poly log}(d)} + \frac{\sqrt{K}}{d\sqrt{n}} \sqrt{\log(1/\delta)} \right) \right) + O \left( \frac{\sqrt{\log(1/\delta)}}{\text{poly log}(d)} \right) \\ + \tilde{O} \left( \frac{\eta^2 K^2 T^2}{\sqrt{m}} \right) \end{aligned}$$

Recall  $K = \tilde{O}_d(1)$ , with the choice of  $m, n$  in the statement of the theorems, it holds with high probability that  $\Phi_m(w_{KT}, x) \leq 1$ . Thus, the network output always lies in the linear part of the hinge-loss for any  $\eta T \leq d^2$  even at initialization where  $T = 0$ . Therefore, our assumption on the linearity of loss is valid throughout training.

## D REGULARIZED CONTINUAL LEARNING: PROOF OF PROPOSITION 1

**Proposition 3** (Restatement of Prop. 1). *Consider the regularized continual learning problem Eq.6 with same setup as Theorem 1 with  $m \rightarrow \infty$ . The iterates of this algorithm with step-size  $\eta$  are equivalent to unregularized continual learning with step-size  $\tilde{\eta}_T$  where  $\tilde{\eta}_T = \alpha_T \eta / T$  and  $\alpha_T = \frac{1 - (1 - \eta\lambda)^T}{\eta\lambda}$ .*

*Proof.* In regularized continual learning, the objective at task  $k \geq 2$  is:

$$\min_w \hat{F}_k(w) + \frac{\lambda}{2} \|w - w_{k-1}\|^2$$

The GD update rule is the following:

$$\begin{aligned} w_k^{(t+1)} &= w_k^{(t)} - \eta \nabla \hat{F}_k(w_k^{(t)}) - \eta \lambda (w_k^{(t)} - w_{k-1}) \\ &= (1 - \eta \lambda) w_k^{(t)} - \eta \nabla \hat{F}_k(w_k^{(t)}) + \eta \lambda w_{k-1}. \end{aligned}$$

For the first task, there is no regularization, therefore for neuron  $i$  (we drop  $i$  here for ease of notation):

$$\begin{aligned} w_1^{(1)} &= w_1^{(0)} + \eta \frac{1}{\sqrt{m}} \frac{1}{n} \sum_{j=1}^n a_i \phi'(\langle w_1^{(0)}, x_j^1 \rangle) x_j^1 y_j^1 \\ w_1 &:= w_2^{(0)} = w_1^{(T)} = w_1^{(0)} + \frac{\eta T}{\sqrt{m}} \frac{1}{n} \sum_{j=1}^n a_i \phi'(\langle w_1^{(0)}, x_j^1 \rangle) x_j^1 y_j^1 \end{aligned}$$

For the second task, due to the regularization term  $\lambda \|w - w_1\|^2 / 2$ , the first GD update takes the following shape:

$$\begin{aligned} w_2^{(1)} &= (1 - \eta \lambda) w_2^{(0)} + \eta \frac{1}{\sqrt{m}} \frac{1}{n} \sum_{j=1}^n a_i \phi'(\langle w_1^{(0)}, x_j^2 \rangle) x_j^2 y_j^2 + \eta \lambda w_1 \\ &= w_2^{(0)} + \eta \frac{1}{\sqrt{m}} \frac{1}{n} \sum_{j=1}^n a_i \phi'(\langle w_1^{(0)}, x_j^2 \rangle) x_j^2 y_j^2. \end{aligned}$$

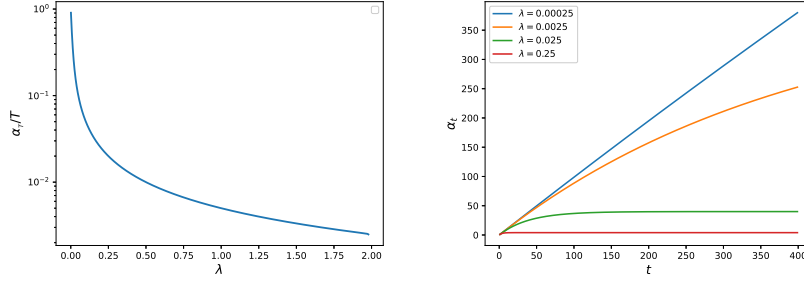

Figure 7: Effective step-size for regularized continual learning  $\alpha_t$  in Prop. 1 based on regularization parameter  $\lambda$  (Left) and number of GD steps  $t$  (Right).

Hence, the first step is identical to the unregularized update rule. For the second step,

$$\begin{aligned} w_2^{(2)} &= (1 - \eta\lambda)w_2^{(1)} + \eta \frac{1}{\sqrt{m}} \frac{1}{n} \sum_{j=1}^n a_i \phi'(\langle w_1^{(0)}, x_j^2 \rangle) x_j^2 y_j^2 + \eta\lambda w_1 \\ &= w_2^{(0)} + ((1 - \eta\lambda) + 1) \frac{\eta}{\sqrt{m}} \frac{1}{n} \sum_{j=1}^n a_i \phi'(\langle w_1^{(0)}, x_j^2 \rangle) x_j^2 y_j^2. \end{aligned}$$

Similarly,

$$\begin{aligned} w_2^{(3)} &= (1 - \eta\lambda)w_2^{(2)} + \eta \frac{1}{\sqrt{m}} \frac{1}{n} \sum_{j=1}^n a_i \phi'(\langle w_1^{(0)}, x_j^2 \rangle) x_j^2 y_j^2 + \eta\lambda w_1 \\ &= w_2^{(0)} + ((1 - \eta\lambda)((1 - \eta\lambda) + 1) + 1) \frac{\eta}{\sqrt{m}} \frac{1}{n} \sum_{j=1}^n a_i \phi'(\langle w_1^{(0)}, x_j^2 \rangle) x_j^2 y_j^2. \end{aligned}$$

Therefore for  $t \leq T$ :

$$w_2^{(t)} = w_2^{(0)} + \alpha_t \frac{\eta}{\sqrt{m}} \frac{1}{n} \sum_{j=1}^n a_i \phi'(\langle w_1^{(0)}, x_j^2 \rangle) x_j^2 y_j^2.$$

The same steps can be repeated for every task to obtain:

$$w_k^{(t)} = w_k^{(0)} + \alpha_t \frac{\eta}{\sqrt{m}} \frac{1}{n} \sum_{j=1}^n a_i \phi'(\langle w_1^{(0)}, x_j^2 \rangle) x_j^2 y_j^2,$$

which leads to the following expression for any  $k \geq 2$ :

$$w_k := w_1^{(0)} + \frac{\eta T}{\sqrt{m}} \frac{1}{n} \sum_{j=1}^n a_i \phi'(\langle w_1^{(0)}, x_j^1 \rangle) x_j^1 y_j^1 + \alpha_T \frac{\eta}{\sqrt{m}} \frac{1}{n} \sum_{\kappa=2}^k \sum_{j=1}^n a_i \phi'(\langle w_1^{(0)}, x_j^\kappa \rangle) x_j^\kappa y_j^\kappa$$

where

$$\alpha_1 = 1, \alpha_t = (1 - \eta\lambda)\alpha_{t-1} + 1 \text{ for } t > 1$$

We can find the following closed form expression to the equations above:  $\alpha_t = \frac{1 - (1 - \eta\lambda)^t}{\eta\lambda}$ . This completes the proof.  $\square$

With an accurate approximation, we have

$$\alpha_t \approx \frac{1 - e^{-\eta\lambda t}}{\eta\lambda}.$$

For small  $t$ , we have  $\alpha_t \approx t$ , whereas for large  $t \approx T$ , assuming  $\lambda = c/T$ : we have  $\alpha_t = \frac{T(1 - e^{-\eta c})}{\eta c}$ . Figure 7 illustrates  $\alpha_T/T$  versus regularization parameter  $\lambda$  and  $\alpha_t$  based on  $t$  for different regularization parameters. Note that larger values of  $\lambda$  correspond to smaller values of  $\alpha_t$  leading to weights moving shorter distances from their initialization points. As  $\lambda \rightarrow 0$ , we have  $\alpha_T/T \rightarrow 1$ , as the step-size for regularized problem converges to the step-size for unregularized one.

E ADDITIONAL EXPERIMENTS AND IMPLEMENTATION DETAILS

**Experiments with MNIST and FashionMNIST.** In Figure 11 (Top), we consider continual binary classification of digits from the MNIST dataset with  $K = 2$  tasks. The plots show the amount of increase in training loss of task 1, during learning task 2. The results are averages over 15 independent experiments. For the left plot tasks are determined according to digits 0 – 3 and for the right plot the tasks are determined according to the data distribution formed by digits 4 – 7. The sample-size for the first task is fixed to  $n = 50$  in all curves and different curves correspond to different sample sizes for the second task. The results of previous figures on the role of sample-size continue to hold for this distribution as well, since increasing the sample-size for the second task generally improves the continual learning of the first task. **In Figure 11 (Bottom), we consider a similar experiment but with the FashionMNIST dataset, choose logistic loss and ReLU activation, and set the total number of tasks to  $K = 4$ , where different tasks correspond to data from different labels. Similar to the last experiment, we observe that increasing the sample-size for subsequent tasks generally has a positive impact on the first task’s training loss.**

**Experiments with transformers and GMM data.** We also conduct experiments on attention-based architecture in Figure 12. We plot the train-time forgetting for task 1 for  $K = 2$  overall tasks for a transformer with feedforward neural networks in both the encoder and the decoder parts where we consider  $m_{encoder} = 60, m_{decoder} = 30$  for the left plot and  $m_{encoder} = m_{decoder} = 10$  for the right plot. Results shown are averaged over 10 independent experiments. We remark that for the transformer with smaller size, we observe the similar behavior we observed for neural network experiments, i.e, increasing the sample-size for the second task can noticeably help with train-time forgetting of the first task. On the other hand, for the larger network, the behavior is more complex: increasing  $n$  can help up to a certain threshold ( $n \approx 250$ ), while above this threshold increasing  $n$  hurts continual learning. While we hypothesize this behavior is due to the complex landscape of larger networks, a more thorough investigation is needed.

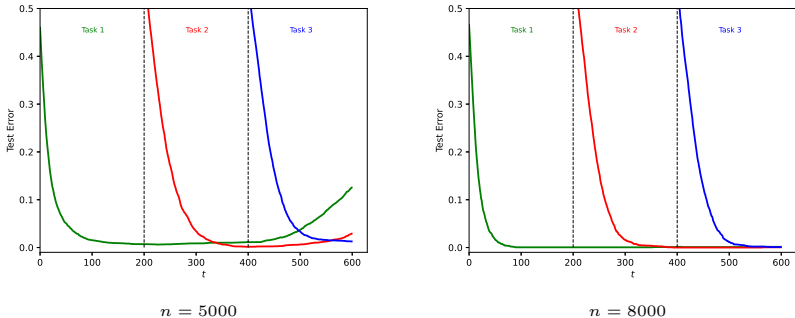

Figure 8: Classification test error for each task vs iterations for the XOR cluster with  $K = 3$  tasks trained on a quadratic network with  $n = 5000$ (left) and  $n = 8000$ (right) training samples per task.

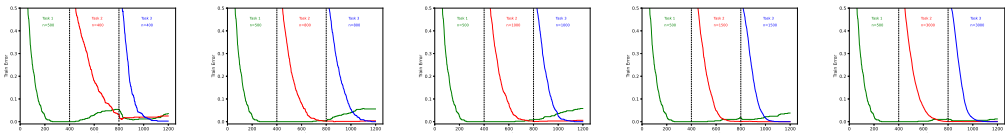

Figure 9: Repeating the experiment of Figure 3 but with ReLU activation and logistic loss.

1512  
 1513  
 1514  
 1515  
 1516  
 1517  
 1518  
 1519  
 1520  
 1521  
 1522  
 1523  
 1524  
 1525  
 1526  
 1527  
 1528  
 1529  
 1530  
 1531  
 1532  
 1533  
 1534  
 1535  
 1536  
 1537  
 1538  
 1539  
 1540  
 1541  
 1542  
 1543  
 1544  
 1545  
 1546  
 1547  
 1548  
 1549  
 1550  
 1551  
 1552  
 1553  
 1554  
 1555  
 1556  
 1557  
 1558  
 1559  
 1560  
 1561  
 1562  
 1563  
 1564  
 1565

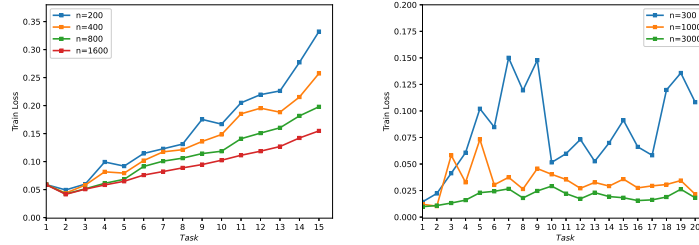

Figure 10: Train loss on task 1 as a function of the task index (i.e.,  $\hat{F}_1(w_k)$  vs.  $k$ ) for  $K = 15$  and  $K = 20$  tasks with  $n$  samples per task for the XOR cluster dataset. The left plot uses GELU activation with logistic loss, while the right plot uses quadratic activation with hinge loss.

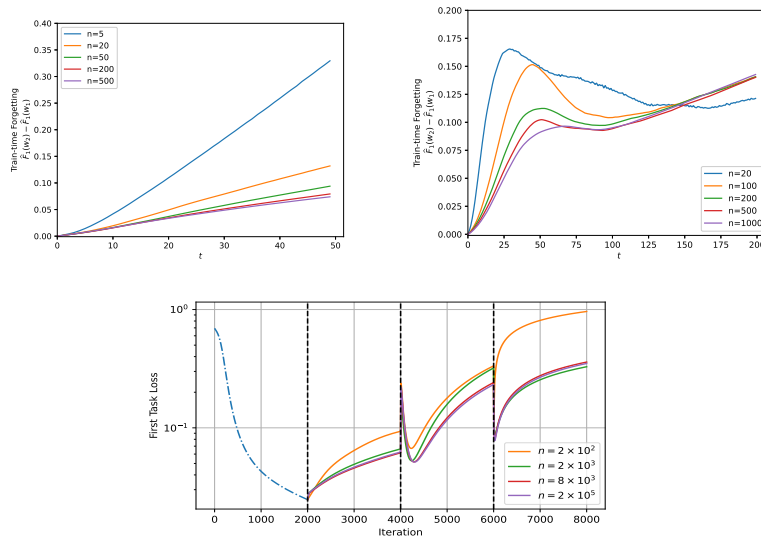

Figure 11: Top: Train-time forgetting for task 1 while learning the second task for  $K = 2$  total tasks from the MNIST dataset, classifying labels '0'/'1' for task 1 and labels '2'/'3' for task 2 (left) and labels '4'/'5' for task 1 and labels '6'/'7' for task 2 (right). We fix  $n = 50$  samples for the first task, and change  $n$  for the second task. Bottom: First task's training loss ( $\hat{F}_1(w^{(t)})$ ) vs  $t$  for learning 4 binary tasks from the split FashionMNIST dataset. We fix  $n = 200$  for Task 1 and plot the training curves while increasing  $n$  for subsequent tasks.

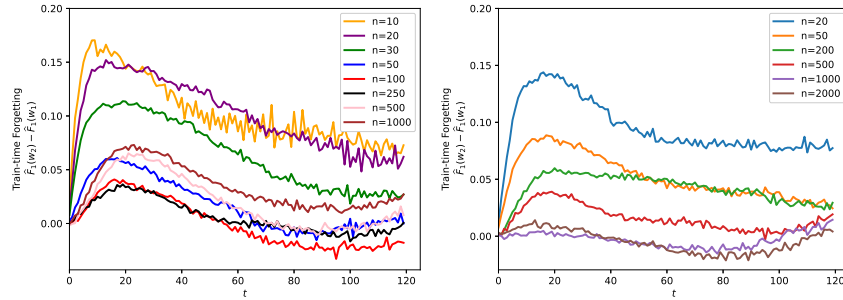

Figure 12: Train-time forgetting for task 1 based on  $t$  for  $K = 2$  tasks with attention-based transformers with large neural net for the encoder and decoder parts(Left plot), and with small neural net(Right plot). Here we consider a tokenized multi-task Gaussian-mixture data where the goal is to find the binary label used for each context window. We fix  $n = 50$  for the first task and change  $n$  for the second task. Note that our insights from previous theoretical and empirical results partially hold for this setting, especially for the transformer with smaller FFN layer.

**Implementation Details for all experiments.** We include the actual values for different problem parameters used in the numerical experiments:

Figure 1:  $n = 2500$  (left),  $n = 5000$ (right), for both plots we set  $d = 50, m = 1000, \eta = 2, T = 200, \sigma = 0.1/\sqrt{d}$  and use linear loss and quadratic activation.

Figure 2:  $d = 50, m = 1000, \eta = 2, T = 200, \sigma = 0.1/\sqrt{d}$ .

Figure 3: GELU activation and logistic loss.  $d = 50, m = 400, \eta = 3, T = 400, \sigma = 0.1/\sqrt{d}$ .

Figure 4: GELU activation, logisitc loss for both plots. We set  $d = 50, m = 2000, \eta = 30, T = 2000, \sigma = 0.2/\sqrt{d}$ . Right:  $n = 2000, T = 4000$ .

Figure 5: We set  $n = 5000, d = 75, \eta = 5, T = 200, \sigma = 0.15/\sqrt{d}$  and vary  $m = 100, 300, 1000, 3000, 6000, 10000$ .

Figure 6: GELU activation, Logistic loss,  $d = 50, n = 200, \eta = 20, T = 1000, \sigma = 0.2/\sqrt{d}$

Figure 8:  $n = 5000$ (left), $8000$ (right), $d = 75, m = 1000, \eta = 5, T = 200, \sigma = 0.15/\sqrt{d}$ , linear loss, quadratic activation

Figure9: Using the same setup as Figure 3 but with ReLU activation and logistic loss.  $d = 50, m = 1000, \eta = 0.3, T = 400, \sigma = 0.1/\sqrt{d}$

Figure 10: GELU activation and logisitc loss,  $\eta = 30, m = 400$  for the left plot, Quadratic activation and Hinge loss,  $m = 1000, \eta = 4$  for the right plot. For both plots we set,  $d = 50, T = 400, \sigma = 0.1/\sqrt{d}$ .

Figure 11: Top:  $n = 50$  samples for the first task,  $n$  varying for the second task, GELU activation, Hinge loss,  $d = 784, m = 500$ . For the left plot  $\eta = 0.0003, T = 50$  and for the right  $\eta = 0.001, T = 200$ . The results are averages over 15 experiments. **Bottom:  $T = 2000, \eta = 0.05, m = 2000, K = 4$ , ReLU activation and Logistic loss, Tasks are chosen from labels 1-4, 7-10 from the FMNIST dataset. Dataset is normalized to have  $\ell_2$ -norm at most 1.**

1620 Figure 12: We use hinge-loss, ReLU activation, and the transformer is one-layer with one head,  
1621 context length = 10, the hidden-layer size of the feedforward neural is 60 and for the decoder is 30.  
1622 In the right plot, both hidden-layer sizes are reduced to 10  $\sigma = 0.1/\sqrt{d}$ ,  $\mu^k = \mathbf{e}_k/\sqrt{d}$  for  $k \in [2]$ ,  
1623  $\eta = 0.01$ .  
1624  
1625  
1626  
1627  
1628  
1629  
1630  
1631  
1632  
1633  
1634  
1635  
1636  
1637  
1638  
1639  
1640  
1641  
1642  
1643  
1644  
1645  
1646  
1647  
1648  
1649  
1650  
1651  
1652  
1653  
1654  
1655  
1656  
1657  
1658  
1659  
1660  
1661  
1662  
1663  
1664  
1665  
1666  
1667  
1668  
1669  
1670  
1671  
1672  
1673
